1 **Title: Shedding Light on the Threespine Stickleback Circadian Clock**

2

3 Running title: Stickleback circadian clock and activity

4

5 Authors: Marie-Pier Brochu<sup>1</sup> and Nadia Aubin-Horth<sup>1</sup>

6

7 Affiliations: <sup>1</sup>Département de Biologie and Institut de Biologie Intégrative et des Systèmes  
8 (IBIS), Université Laval, Québec, QC G1V 0A6, Canada.

9

10 Author's email address: [marie-pier.brochu.4@ulaval.ca](mailto:marie-pier.brochu.4@ulaval.ca), [nadia.aubin-horth@bio.ulaval.ca](mailto:nadia.aubin-horth@bio.ulaval.ca)

11

12 Key words: circadian rhythms, threespine stickleback, clock genes, locomotor activity,  
13 natural population, interindividual variation

14

15 Summary statement: We found that in wild-caught threespine sticklebacks, the circadian  
16 clock does not control locomotor activity in most, but not all, individuals. Sticklebacks are  
17 mostly nocturnal, although interindividual variation exists.

18

19 **ABSTRACT**

20 The circadian clock is an internal timekeeping system shared by most organisms, and  
21 knowledge about its functional importance and evolution in natural environments is still  
22 needed. Here, we investigated the circadian clock of wild-caught threespine sticklebacks  
23 (*Gasterosteus aculeatus*) at the behavioural and molecular levels. While their behaviour,  
24 ecology, and evolution are well studied, information on their circadian rhythms are scarce.  
25 We quantified the daily locomotor activity rhythm under a light-dark cycle (LD) and under  
26 constant darkness (DD). Under LD, all fish exhibited significant daily rhythmicity, while under  
27 DD, only 18% of individuals remained rhythmic. This interindividual variation suggests that  
28 the circadian clock controls activity only in certain individuals. Moreover, under LD, some  
29 fish were almost exclusively nocturnal, while others were active around the clock.  
30 Furthermore, the most nocturnal fish were also the least active. These results suggest that  
31 light masks activity more strongly in some individuals than others. Finally, we quantified the  
32 expression of five clock genes in the brain of sticklebacks under DD using qPCR. We did  
33 not detect circadian rhythmicity, which could either indicate that the clock molecular  
34 oscillator is highly light-dependent, or that there was an oscillation but that we were unable  
35 to detect it. Overall, our study suggests that a strong circadian control on behavioural  
36 rhythms may not necessarily be advantageous in a natural population of sticklebacks and  
37 that the daily phase of activity varies greatly between individuals because of a differential  
38 masking effect of light.

39

## 40 INTRODUCTION

41 Many behaviours and physiological processes in living organisms exhibit daily rhythmicity,  
42 for example: locomotor and feeding activity, hormone secretion, and metabolism (Refinetti,  
43 2016). Some of these rhythms persist in the absence of external cues, because they are  
44 driven by an endogenous mechanism called the circadian clock (Kumar, 2017). Found in  
45 almost all life forms, this internal clock usually has an intrinsic period of approximately 24 h  
46 and is entrained by temporal signals such as the light-dark cycle, so that the phase of  
47 circadian rhythms is synchronized with relevant environmental variables (ex.: being awake  
48 when feeding or mating opportunities are present). The circadian clock thus allows the  
49 anticipation of daily environmental changes and the coordination of biological functions, and  
50 can have fitness consequences (Vaze and Sharma, 2013; Dominoni et al., 2017). The heart  
51 of the circadian clock is a cell-autonomous molecular oscillator made up of a transcription-  
52 translation feedback loop that involves positive and negative elements (Bell-Pedersen et al.,  
53 2005). In mammals, BMAL and CLOCK are positive elements that induce the transcription  
54 of *period* (*per*) and *cryptochrome* (*cry*). PER and CRY are negative elements that inhibit  
55 their own transcription by down-regulating the activity of BMAL and CLOCK (Rosensweig  
56 and Green, 2020). Generally speaking, the expression level of *bmal* and *clock* is in antiphase  
57 with that of *per* and *cry* (Takahashi, 2017). These four clock genes are highly conserved in  
58 animals, but, because of genome duplication events, several of them retain two paralogous  
59 copies in the different vertebrate lineages (Bell-Pedersen et al., 2005).

60

61 In the last decade, our knowledge of the organization and functioning of circadian rhythms  
62 in animals has expanded with the study of various wild species, building on the work mostly  
63 acquired in laboratory settings with model organisms (*Mus musculus*, *Danio rerio*,  
64 *Drosophila melanogaster*) (Kronfeld-Schor et al., 2013; Schwartz et al., 2017). This growing  
65 body of research shows that the implication of the circadian clock in driving biological  
66 rhythms can vary greatly depending on a species' biology (reviewed in Bloch et al., 2013;  
67 Hazlerigg and Tyler, 2019) and that the opportunities, threats and challenges that organisms  
68 face in natural environments can influence their circadian rhythms (Hut et al., 2012; Helm et  
69 al., 2017). For example, some species adjust the phase of their circadian activity rhythm in  
70 response to light intensity (Chiesa et al., 2010), food availability (Lopez-Olmeda et al., 2010;  
71 Ware et al., 2012), predation risk (Pellman et al., 2015) and social interactions (Fuchikawa  
72 et al., 2016). In order to improve our understanding of the functional importance of the  
73 circadian clock in nature (i.e. the benefits it provides to an individual in a given environment)

74 and which selection pressures can shape the evolution of circadian rhythms, we must  
75 continue to investigate a diversity of species that have evolved in various ecological contexts  
76 and that are amenable to experimental and physiological studies (Kronfeld-Schor et al.,  
77 2013; Schwartz et al., 2017). The threespine stickleback (*Gasterosteus aculeatus*) is well  
78 studied in ecology and evolution (McKinnon et al., 2019). This small fish is also well suited  
79 to answer questions about the ecological and evolutionary implications of the circadian clock  
80 through the study of its natural phenotypic variation, which can be combined with  
81 experimental work. Stickleback ecotypes are found in diverse habitats (marine waters, salt  
82 marshes, streams, rivers, lakes, etc.) and display morphological, physiological, and  
83 behavioural adaptations to these environments (Bell and Foster, 1994; Ostlund-Nilsson et  
84 al., 2007; Kitano et al., 2010; Di-Poi et al., 2014; Di Poi et al., 2016; Ishikawa et al., 2019).  
85 Many of the environmental pressures that differ between ecotypes such as the presence of  
86 predators and parasites, prey availability, light intensity and social interactions (Ostlund-  
87 Nilsson et al., 2007) have the potential to influence circadian rhythms (Helm et al., 2017).  
88 This could be achieved either through selective pressure resulting in genetic divergence, or  
89 through phenotypic plasticity, i.e. the effects of the environment on the development of a  
90 phenotype, here the circadian rhythm itself. As sticklebacks are also known for their  
91 interindividual variation in behaviour, called personality (activity, boldness, sociality, etc.  
92 (Huntingford, 1976; Bell, 2005; Wark et al., 2011)), it is also possible that they exhibit  
93 interindividual variation in circadian rhythms. So far, it has been suggested that circadian  
94 molecular mechanisms may vary between ecotypes similarly to traits at other levels of  
95 biological organization, although the functional impact of this difference is not known. For  
96 example, using common garden-raised sticklebacks from two lake-stream pairs, a previous  
97 study reported that a gene that is part of the molecular oscillator (*cry1ab*) was upregulated  
98 in the liver of stream sticklebacks compared to lake ones (Hanson et al., 2017). Studying  
99 circadian rhythms in sticklebacks will help us to better understand the functional importance  
100 and the evolution of the circadian clock in natural environments.

101

102 In comparison to what is known about the ecology and evolution of sticklebacks, very little  
103 knowledge is available on their circadian rhythms and clock. In fact, the existence of a  
104 circadian clock has never been demonstrated in this species. At the behavioural level,  
105 sticklebacks have, to our knowledge, only been studied once under constant light conditions.  
106 This study showed that the frequency with which males visited their nests (in the hope of  
107 finding eggs deposited by a female) did not display circadian rhythmicity in constant light

108 (Sevenster et al., 1995). Regarding the daily activity rhythm (i.e. under a light-dark cycle),  
109 some evidence suggests that sticklebacks are diurnal. For instance, stickleback visual  
110 opsins (Rennison et al., 2012) correspond to those of diurnal fish (Carleton et al., 2020).  
111 Moreover, previous studies reported that sticklebacks were mostly captured during the day  
112 in the wild (Worgan and FitzGerald, 1981; Sjoberg, 1985; Reebbs et al., 1995). On the other  
113 hand, night activity (Reebbs et al., 1984; Quinn et al., 2012) and night feeding (Mussen and  
114 Peeke, 2001) have been observed in some sticklebacks. At the physiological level, we know  
115 that melatonin levels (a hormone that plays a key role in the regulation of circadian rhythms)  
116 are higher during the night than during the day in sticklebacks (Mayer et al., 1997;  
117 Kulczykowska et al., 2017; Pomianowski et al., 2020) as in most vertebrates (Challet, 2007;  
118 Falcón et al., 2009), but we do not know if this rhythm is driven by the clock or solely by light  
119 (Falcón et al., 2009). At the molecular level, time-of-day variation in the expression of *per1b*  
120 and *clock1b* has been observed in the liver of sticklebacks, but since this was measured  
121 under a light-dark cycle, we do not know if this rhythm is self-sustained (Prokkola et al.,  
122 2015).

123

124 In this study, using wild-caught threespine sticklebacks, we investigated the circadian clock  
125 of this species at the behavioural and molecular levels. Our first objective was to determine  
126 if the daily rhythm of locomotor activity is under circadian clock control, and we hypothesized  
127 that it is indeed the case. Our prediction was that sticklebacks would show a significant  
128 rhythm of locomotor activity under constant darkness (DD). Our second objective was to  
129 determine the phase of activity of sticklebacks under LD. We hypothesized that sticklebacks  
130 are diurnal. Our prediction was that the daily activity would be mainly performed during the  
131 light phase. Our third objective was to quantify the molecular oscillation of five clock genes  
132 (*bmal1a*, *clock1b*, *clock2*, *per1b* and *cry1b*) in the brain, an organ that is potentially  
133 implicated in the control of circadian rhythms. We hypothesized that clock gene expression  
134 shows circadian rhythmicity under DD. Our prediction was that the expression level of  
135 *bmal1a*, *clock1b* and *clock2* would be in antiphase with that of *per1b* and *cry1b*.

136

## 137 **MATERIALS AND METHODS**

### 138 **Fish sampling and housing**

139 We collected threespine sticklebacks (*Gasterosteus aculeatus*) from the wild population of  
140 the lac Témiscouata (47°48'37.1"N 68°51'56.6"W, Québec, Canada) in June 2019. We did  
141 not have specific information on the daily activity patterns of this species in the lac

142 Témiscouata. We thus sampled fish with a beach seine so that we could collect all  
143 individuals in the water column no matter if they were resting at the bottom of the lake or  
144 swimming at the surface. We sampled fish in the morning (around 8:00), in the afternoon  
145 (around 15:00) and in the evening (around 19:00) to account for the possibility that some  
146 individuals migrate daily between different parts of the lake. Sticklebacks were brought back  
147 to the Laboratoire de Recherches en Sciences Environnementales et Médicales (LARSEM)  
148 at Université Laval (Québec, Canada). In the animal facility, fish were held in two 1000 L  
149 water tanks (n=140/tank) and were fed brine shrimp and nutritious flakes twice a day  
150 (morning and late afternoon). They were exposed to non-breeding environmental conditions,  
151 a water temperature of 14°C and a 12 h light:12 h dark cycle with lights on at 6:00 and lights  
152 off at 18:00.

153

### 154 **Activity monitoring system**

155 To monitor locomotor activity, 18 fish were transferred in an adjacent room and individually  
156 placed in 2 L experimental tanks. A white plexiglass separated each tank to prevent fish  
157 from seeing each other. Lighting was provided by three full-spectrum LED light bars (Plant  
158 3.0, Fluval) mounted above the tanks. Illuminance was measured by a lux meter (LX1330B,  
159 Dr.meter) and was around 500 lux at the water surface. We chose this illuminance value  
160 based on previous studies in other fish species (Iigo and Tabata, 1996; Whitmore et al.,  
161 2000; Bayarri et al., 2004; Lopez-Olmeda et al., 2010). A dark plastic curtain was hanging  
162 in front of the tanks to ensure a constant illumination (or darkness) when we needed to enter  
163 the room for maintenance.

164

165 Each experimental tank was equipped with an infrared photoelectric sensor (E3Z-D67,  
166 Omron) placed in the lower third of the front wall (Fig. S1). We had previously established  
167 that this position was optimal to record stickleback movements (Fig. S2). Every time a fish  
168 interrupted the infrared light beam that was emitted by the sensor, an output signal was sent  
169 to a controller (ILC 131 ETH, Phoenix Contact). Each interruption was counted as one  
170 movement. Data was retrieved by connecting a computer to the controller.

171

### 172 **Experimental design**

173 All experimental procedures were approved by the Comité de Protection des Animaux de  
174 l'Université Laval (CPAUL 2018066-2). Since we could monitor 18 fish at a time, we divided  
175 individuals into three groups (Fig. 1). Individuals were allowed to acclimate to the

176 experimental tanks for at least three days before the start of the experiment. For all three  
177 groups, food was provided by hand once a day at random time (previously determined using  
178 the RAND() function in Excel software). We used a dim red light when food was provided  
179 during the dark phase.

180

181 Group 1 was exposed to a 12 h light:12 h dark (LD) cycle for eight days (lights on at 6:00  
182 and lights off at 18:00) followed by ten days of constant darkness (DD). Group 1 was used  
183 to quantify locomotor activity under LD and DD. Groups 2 and 3 were also exposed to LD  
184 for eight days and used to quantify locomotor activity under LD. On the ninth day of the  
185 experiment with groups 2 and 3, lights were not turned on at 6:00 so all fish were exposed  
186 to DD for at least 24 h. On the tenth day, we sampled the brain and the caudal fin of four  
187 randomly selected individuals every 6 h throughout a 24-h cycle (6:00, 12:00, 18:00, 0:00),  
188 see Fig. 1. Tissue collection was performed in darkness with the help of a dim red light and  
189 took less than 3 minutes per fish. After dissection, brains and caudal fins were immediately  
190 stabilized in RNA $later$  (Ambion) and stored at -20°C. We used caudal fins to determine sex  
191 with the IDH genetic sex marker (Peichel et al., 2004).

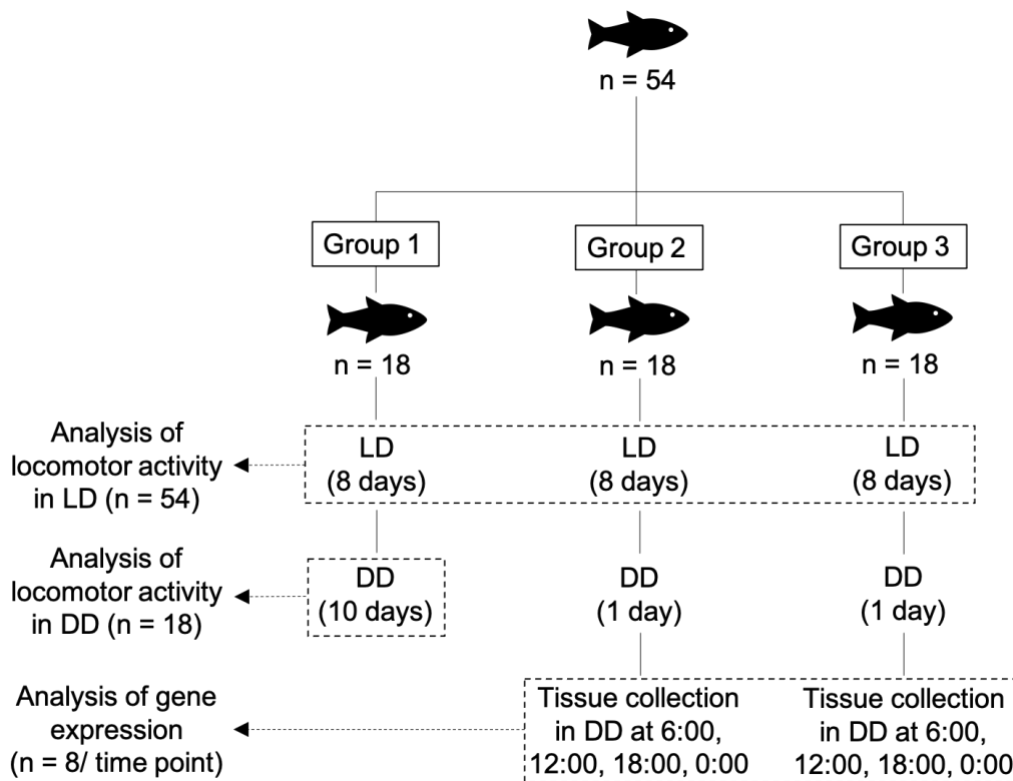

192

193 **Fig. 1. Experimental design.** Group 1 was used to quantify locomotor activity under a 12 h  
194 light:12 h dark cycle (LD, lights on at 6:00 and lights off at 18:00) and under constant

195 darkness (DD). To that end, group 1 was exposed to LD for 8 days, then to DD for 10 days.  
 196 Groups 2 and 3 were used to quantify locomotor activity under LD and brain gene expression  
 197 under DD. Groups 2 and 3 were thus exposed to LD for 8 days, then to DD for 1 day (day  
 198 9). The day following the switch to DD (day 10), we sampled the brain of four randomly  
 199 selected individuals every 6 h throughout a 24-h cycle (6:00, 12:00, 18:00, 0:00).

200

## 201 **Choice of genes**

202 We chose to quantify the expression of *bmal1a*, *clock1b*, *clock2*, *per1b* and *cry1b* although  
 203 sticklebacks have several other clock genes (Table 1). We chose these five genes for three  
 204 reasons. First, we wanted to quantify positive (*bmal*, *clock*) and negative (*per*, *cry*) elements  
 205 to have an overall view of the transcription-translation feedback loop. Second, we chose  
 206 genes that have an ortholog in the zebrafish to compare our results with what is known from  
 207 this model organism (Table 1). Third, we avoided quantifying *per2a* and *cry1aa* because  
 208 these two genes are mainly light-induced (in opposition to being clock controlled) in the  
 209 zebrafish (Pando et al., 2001; Tamai et al., 2007; Vatine et al., 2009), so their expression  
 210 rhythm rapidly loses its amplitude under DD (ex.: Beale et al., 2013) and thus would not be  
 211 informative in our study in DD.

212

213 **Table 1.** The four core genes of the transcription-translation feedback loop of the clock  
 214 molecular oscillator in mammals, zebrafish and sticklebacks. The five stickleback genes that  
 215 we investigated in this study are in bold in the table.

| Gene                      | Mammals      | Zebrafish      | Stickleback           | Reference for the phylogenetic analysis |
|---------------------------|--------------|----------------|-----------------------|-----------------------------------------|
| <i>bmal</i>               | <i>bmal1</i> | <i>bmal1a</i>  | <b><i>bmal1a</i></b>  | Wang (2009)                             |
|                           |              | <i>bmal1b</i>  | -                     |                                         |
|                           | <i>bmal2</i> | <i>bmal2a</i>  | -                     |                                         |
|                           |              | -              | <i>bmal2b</i>         |                                         |
| <i>clock</i>              | <i>clock</i> | <i>clock1a</i> | -                     | Wang (2008b)                            |
|                           |              | <i>clock1b</i> | <b><i>clock1b</i></b> |                                         |
|                           | <i>npas2</i> | <i>clock2</i>  | <b><i>clock2</i></b>  |                                         |
| <i>period (per)</i>       | <i>per1</i>  | <i>per1a</i>   | -                     | Wang (2008a)                            |
|                           |              | <i>per1b</i>   | <b><i>per1b</i></b>   |                                         |
|                           | <i>per2</i>  | <i>per2a</i>   | <i>per2a</i>          |                                         |
|                           |              | -              | <i>per2b</i>          |                                         |
| <i>per3</i>               | <i>per3</i>  | -              |                       |                                         |
| <i>cryptochrome (cry)</i> | <i>cry1</i>  | <i>cry1aa</i>  | <i>cry1aa</i>         | Liu et al. (2015)                       |
|                           |              | <i>cry1ab</i>  | <i>cry1ab</i>         |                                         |
|                           |              | <i>cry1ba</i>  | <b><i>cry1ba</i></b>  |                                         |
|                           |              | <i>cry1bb</i>  | -                     |                                         |
|                           | <i>cry2</i>  | <i>cry2</i>    | <i>cry2</i>           |                                         |
| -                         | <i>cry3</i>  | -              |                       |                                         |

216



## 217 Gene expression in the brain

218 We studied clock gene expression using a quantitative real-time PCR (qPCR) approach. We  
219 extracted total RNA in the brain of sticklebacks and performed a DNase digestion using the  
220 miRNeasy Mini Kit (Qiagen) combined with the RNase-Free DNase Set (Qiagen). We stored  
221 RNA at -70°C. We quantified RNA using the Quant-iT RiboGreen RNA Assay Kit (Invitrogen)  
222 and assessed RNA quality and integrity with the RNA 6000 Nano Kit (Agilent). All samples  
223 showed RNA integrity numbers (RIN) greater than 9.0. For all samples we reverse-  
224 transcribed 10 µL of RNA at 100 ng µL<sup>-1</sup> with 4 µL of the 5X qScript cDNA SuperMix  
225 (Quantabio) and 6 µL of RNase-free water in a final volume of 20 µL. Following the  
226 manufacturer's protocol, thermocycling parameters were 25 °C for 5 min, 42°C for 30 min  
227 and 85°C for 5 min.

228

229 We obtained cDNA sequences of *bmal1a*, *clock1b*, *clock2*, *per1b* and *cry1b* from the  
230 *Ensembl Genome Browser* (version 98) and designed primers using Primer3 (Table 2). We  
231 did *in silico* specificity screen with the Amplify4 software to ensure that primers for a given  
232 gene were not amplifying any paralogs. We also verified specificity of primers and absence  
233 of primer dimers with melting curves (60-95°C). To further guarantee that the primers were  
234 amplifying the targeted genes, we analyzed amplicons by Sanger sequencing. We assessed  
235 PCR amplification efficiency of each primer pair with a qPCR experiment using a four or five-  
236 point standard curve made of a fivefold dilution series of pooled cDNA samples. Efficiency  
237 is reported in Table 2.

238

239 **Table 2.** Characteristics of the primers used to quantify clock gene expression. Efficiency  
240 (E) was calculated using  $E = (10^{-1/\text{slope}} - 1) * 100$  (Pfaffl, 2001).

| Gene           | Ensembl Transcript ID | Forward primer           | Reverse primer           | Amplicon size (bp) | Efficiency (%) |
|----------------|-----------------------|--------------------------|--------------------------|--------------------|----------------|
| <i>bmal1a</i>  | ENSGACT0000003205     | ACGGCTCGTT<br>CATCACTCTG | AGTCCGATCC<br>CTCCATCACA | 123                | 98.7           |
| <i>clock1b</i> | ENSGACT00000021080    | GATCGACAGA<br>TCCGGTTCCC | GTCTGGGTTT<br>GACCTCCCTG | 164                | 98.5           |
| <i>clock2</i>  | ENSGACT00000026929    | GCACTCACAC<br>TGTTGTCAGC | CCTTCACTGA<br>AGAGGGAGCG | 105                | 96.4           |
| <i>per1b</i>   | ENSGACT00000025573    | CTACCAGCTC<br>ACCATCAGAG | ACGAGGAGTT<br>TCGTATCCAG | 94                 | 109.8          |
| <i>cry1b</i>   | ENSGACT00000017852    | GAGACAGAAG<br>GCCTGACCAC | CTCAAAGTTTG<br>CCACCCACG | 105                | 107.9          |

241

242 We performed qPCR experiments in the 7500 Fast Real-Time PCR System (Applied  
243 Biosystems) using 5 µL of cDNA at 1 ng µL<sup>-1</sup>, 10 µL of the 2X PerfeCTa SYBR Green FastMix

244 (Quantabio), 1  $\mu$ L of primer pairs at 10  $\mu$ M (final concentration of 250 nM for each primer)  
 245 and 4  $\mu$ L of nuclease-free water for a total volume of 20  $\mu$ L. All samples were run in triplicate  
 246 on a single 96-well plate for a given gene. We included no-template and no-reverse  
 247 transcription controls. The thermocycling protocol was 95°C for 3 min (initial denaturation),  
 248 followed by 40 cycles of 15 s at 95°C (denaturation) and 45 s at 60°C (annealing).

249

250 We used the NormFinder software (Andersen et al., 2004) to identify the optimal reference  
 251 gene (or combination of reference genes) for our experiment between *ubc*, *hprt1*, *rpl13a*,  
 252 *gapdh* and  $\beta$ -*actin* (Table 3). We did the analysis on 12 cDNA samples that were previously  
 253 obtained in the same conditions as experimental samples during a pilot study. The  
 254 NormFinder algorithm identified *ubc* as the most stable gene between time points. We thus  
 255 calculated the relative expression of target genes using the  $\Delta\Delta Cq$  method adjusted for  
 256 efficiency of each primer pairs (Pfaffl, 2001) with *ubc* as the reference gene.

257

258 **Table 3.** Characteristics of the primers used in the search for the optimal reference gene.  
 259 Using the NormFinder software, *ubc* was identified as the most stable gene between time  
 260 points and was used as the reference gene (shown in bold). Efficiency (E) was calculated  
 261 using  $E = (10^{-1/\text{slope}} - 1) * 100$  (Pfaffl, 2001).

| Gene                   | Ensembl Transcript ID    | Forward primer             | Reverse primer             | Amplicon size (bp) | Efficiency (%) | Reference for primer sequences |
|------------------------|--------------------------|----------------------------|----------------------------|--------------------|----------------|--------------------------------|
| <i>ubc</i>             | <b>ENSGACT0000010662</b> | <b>AGACGGGCATAGCACTTGC</b> | <b>CAGGACAAGGAAGGCATCC</b> | 218                | 102.0          | Hibbeler et al. (2008)         |
| <i>hprt1</i>           | ENSGACT0000024687        | TCTCCTCCGTTAGAAGACTGCAT    | TTCAGGTCATACCTTGCTCATC     | 92                 | 108.3          | <i>This study</i>              |
| <i>rpl13a</i>          | ENSGACT0000012382        | CACCTTGGTCAACTTGAACAGTG    | TCCCTCCGCCCTACGAC          | 218                | 95.4           | Hibbeler et al. (2008)         |
| <i>gapdh</i>           | ENSGACT0000007902        | CAAACCGTTGGTGACAGTATTG     | GCACTGAGCATAAGGACACATCTAA  | 71                 | 100.4          | Sanogo et al. (2011)           |
| $\beta$ - <i>actin</i> | ENSGACT0000010474        | ACATCAGGAGTGATGGTGG        | CAGGATACCTCTCTTGCTCTG      | 79                 | 108.2          | Gao et al. (2011)              |

262

## 263 Data analysis

### 264 *Locomotor activity rhythm*

265 Of the 54 individuals that we used in our experiments, six were discarded from analyses  
 266 because they died during experiments (n=3) or were parasitized (n=3). For the 48 remaining  
 267 individuals, we gathered locomotor activity data in 10-min bins for analysis purposes.  
 268 Actograms, activity profiles and  $\chi^2$  periodograms were produced using the ActogramJ plugin

269 in ImageJ (Schmid et al., 2011) for each fish under LD (n=48) and under DD (n=17). The  $\chi^2$   
270 periodogram analysis calculates Qp values for multiple periods within a fixed range. The  
271 period with the highest Qp value corresponds to the estimated period of the rhythm. Since  
272 Qp has a probability distribution of  $\chi^2$  (with a P-1 degree of freedom, where P is the period),  
273 we can determine if the Qp value for the estimated period is significant with  $\alpha=0.05$   
274 (Sokolove and Bushell, 1978). In other words, the periodogram analysis lets us know if the  
275 rhythm is significant and, if so, what is the period of this rhythm. We first did the periodogram  
276 analysis using periods ranging between 0 h and 32 h, but we did not find any significant  
277 ultradian endogenous rhythms (i.e. rhythms with periods shorter than circadian rhythms).  
278 Thus, we show periodograms with periods ranging between 16 h and 32 h to facilitate  
279 visualization. We performed all other statistical analyses using R software version 4.0.1 (R  
280 Core Team, 2020). When needed, we evaluated normal distribution of data using Q-Q plots  
281 and Shapiro-Wilk test and we verified homogeneity of variances using Levene's test.

282

### 283 *Masking effect of light*

284 We evaluated the difference in the average activity level (movements/10 min) during the  
285 light phase in LD and the subjective light phase in DD using a paired t-test. This comparison  
286 allows us to assess the importance of the masking effect of light, which can suppress or  
287 enhance activity without entraining the internal clock (Mrosovsky, 1999). We also verified if  
288 the difference in the average activity level during the light phase in LD and the subjective  
289 light phase in DD differs between sexes using a t-test.

290

### 291 *Phase of activity*

292 Although our hypothesis was that sticklebacks are diurnal, we rather observed a tendency  
293 towards nocturnality under LD. Thus, to quantify the phase of activity in each fish, we  
294 calculated the percentage of the total daily activity performed during the dark phase (also  
295 referred as the night activity). By assessing the night activity, we observed large  
296 interindividual variation for the phase of activity, but we also noticed large interindividual  
297 variation in total daily activity. We thus assessed sex differences in night activity and in total  
298 daily activity using t-tests and we evaluated the correlation between these two variables  
299 using Pearson's correlation test. Data are represented as mean  $\pm$  standard error of the  
300 mean.

301

302

303 *Clock gene expression rhythms in the brain*

304 Among the six individuals that were discarded from the analysis, five were from groups 2  
305 and 3, so there were 31 individuals left for the brain gene expression analysis. We thus  
306 sampled eight individuals at 6:00, 18:00 and 0:00 (n=8) and seven individuals at 12:00 (n=7).  
307 Moreover, one individual was removed from the 18:00 time point for *clock2* because it was  
308 identified as an extreme outlier using the `identify_outliers()` function from the `rstatix` package  
309 in R (Kassambara, 2020). We evaluated differences in relative gene expression between  
310 time points using one-way ANOVA. Relative gene expression was also subjected to cosinor  
311 analysis using the `cosinor2` package (Mutak, 2018). The cosinor analysis fits a cosine  
312 function with a known period (24 h) to the expression values so that we can estimate the  
313 amplitude, the acrophase (peak time) and the mesor (mean of all expression values) of the  
314 rhythm (Refinetti et al., 2007). This procedure also calculates the probability that the  
315 amplitude is significantly different from zero using the *F*-distribution. When the p-value is  
316 <0.05, we can consider that gene expression shows significant circadian rhythmicity.

317

318 **RESULTS**

319 **Locomotor activity rhythm**

320 Under a 12 h light:12 h dark cycle (LD), a significant daily rhythmicity of 24.0 h ( $\chi^2$   
321 periodogram analysis,  $p < 0.05$ ) was observed for all fish (Fig. 2). Under constant darkness  
322 (DD), most individuals were arrhythmic (Fig. 3A, C, E) and only three out of seventeen  
323 sticklebacks (18%) showed significant circadian rhythmicity ( $\chi^2$  periodogram analysis,  
324  $p < 0.05$ , Fig. 3B, D, F) with periods of 24.8 h, 25.0 h and 26.3 h.

325

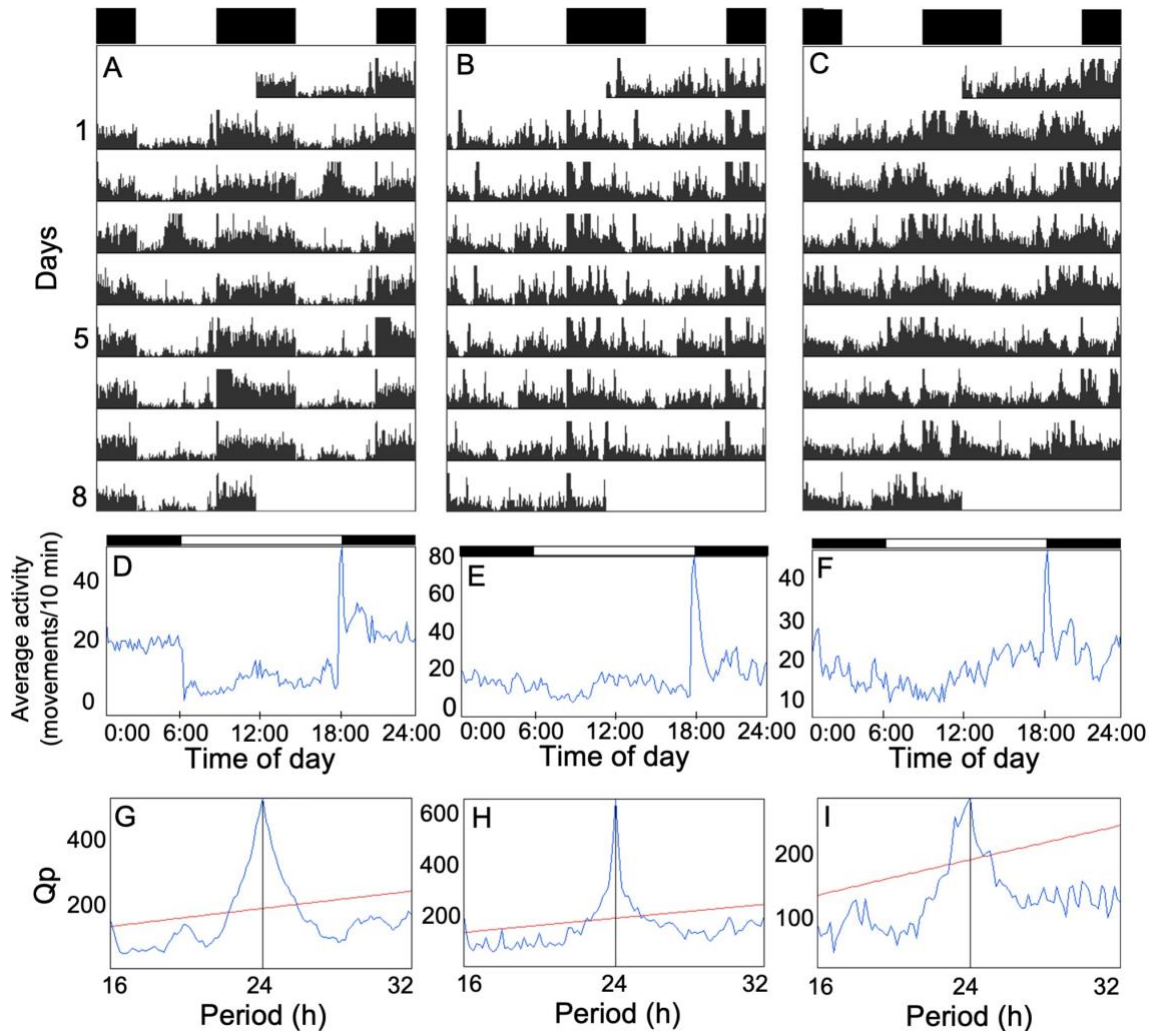

326

327 **Fig. 2. Under LD, stickbacks display significant daily rhythmicity, but show variable**

328 **activity patterns.** Double-plotted actograms (A-C) of three representative individuals under

329 a 12h light:12h dark cycle (LD) and their corresponding activity profile (D-F) and  $\chi^2$

330 periodogram (G-I). The white and black bars at the top of the actograms and the activity

331 profiles represent the light and dark phases, respectively. From left to right, individuals

332 display respectively 77%, 65% and 55% of their daily activity during the dark phase. Activity

333 profiles show the average locomotor activity (number of movements) for each 10-min bin

334 over the 8 days in LD. Qp values on the  $\chi^2$  periodograms quantify the rhythmic component

335 of the activity and the red horizontal line indicates the significance threshold (set at p=0.05).

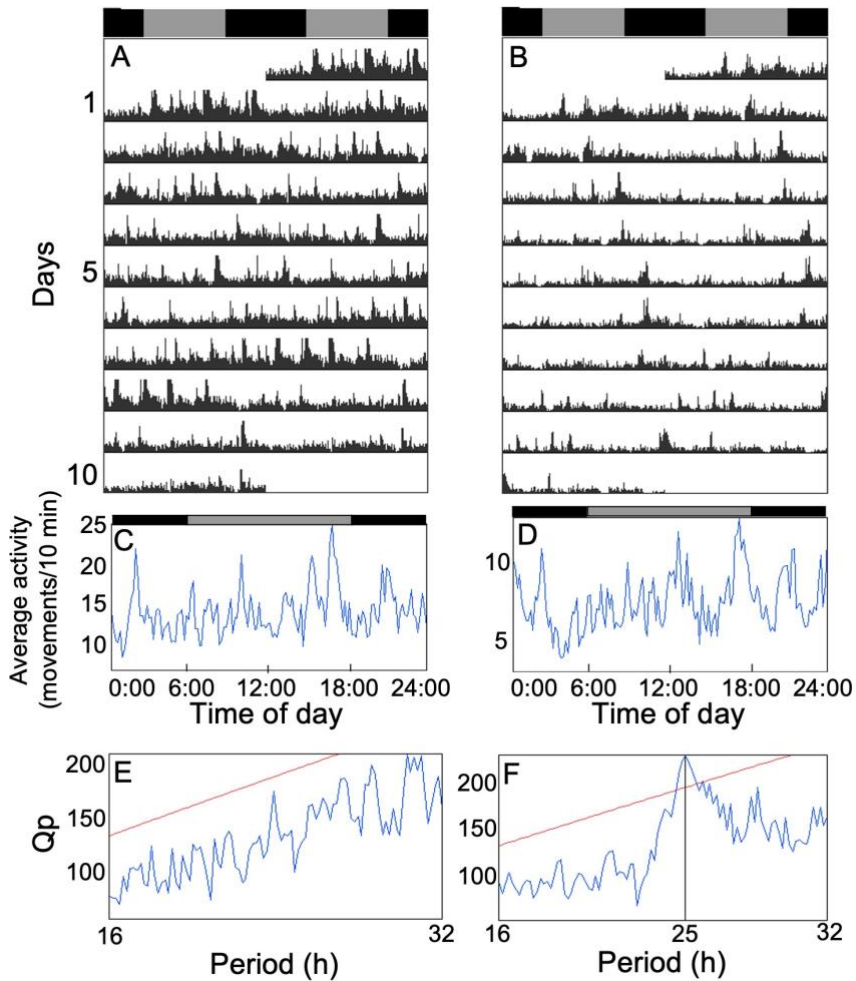

336

337

338

339

340

341

342

343

344

345

346

347

348

349

350

**Fig. 3. Under DD, most individuals are arrhythmic and only a few individuals show circadian rhythmicity.** Double-plotted actograms (A-B) of two representative individuals under constant darkness (DD) and their corresponding activity profile (C-D) and  $\chi^2$  periodogram (E-F). The gray and black bars at the top of the actograms and activity profiles represent the subjective light and dark phases, respectively. Under DD, most sticklebacks do not display circadian rhythmicity, as represented by the individual on the left of the figure. On the right, we show one of the three individuals who exhibit significant circadian rhythmicity. Activity profiles show the average locomotor activity (number of movements) for each 10-min bin over the 10 days. Qp values on the  $\chi^2$  periodograms quantify the rhythmic component of the activity and the red horizontal line indicates the significance threshold (set at  $p=0.05$ ).

351 **Masking effect of light**

352 The average activity level (movements/10 min) was significantly lower during the light phase  
353 in LD than during the subjective light phase in DD (paired t-test,  $p < 0.001$ ,  $n = 17$ , Fig. S3).  
354 The difference in the average activity level during the light phase in LD and the subjective  
355 light phase in DD was not significantly different between males ( $n = 7$ ) and females ( $n = 10$ ) (t-  
356 test,  $p = 0.3$ ).

357

358 **Phase of activity**

359 Under LD, a few sticklebacks showed a well-defined phase of activity and were almost  
360 strictly nocturnal (Fig. 2A, D). However, most individuals displayed an unclear phase of  
361 activity and were just slightly more active during the night than during the day (Fig. 2B, C,  
362 E, F). On average, sticklebacks displayed  $61.8 \pm 1.3\%$  ( $n = 48$ ) of their daily activity during the  
363 dark phase. There was interindividual variation in the phase of activity, as measured by the  
364 percentage of the total daily activity displayed during the dark phase (also referred as the  
365 night activity, Fig. 4A), with individuals spending 46.5% to 87.5% of their active time at night.  
366 Of note, the three fish that were rhythmic in DD (described above) were not among the most  
367 nocturnal fish, as they displayed on average 53.0%, 52.9% and 57.0% of their daily activity  
368 during the night under LD. There was no significant difference between males ( $n = 22$ ) and  
369 females ( $n = 26$ ) in night activity (t-test,  $p = 0.3$ ). Under LD, sticklebacks also showed large  
370 interindividual variation in the total daily activity ranging from around 550 to 2750  
371 movements/day (Fig. 4B). Males ( $1655 \pm 99$  movements/day,  $n = 22$ ) were significantly more  
372 active than females ( $1357 \pm 95$  movements/day,  $n = 26$ ) (t-test,  $p = 0.04$ ). There was also a  
373 significant negative correlation between night activity and total daily activity (Pearson's  
374 correlation test,  $r = -0.3$ ,  $p = 0.04$ ,  $n = 48$ ) so that the most nocturnal fish were also the least  
375 active (Fig. 4C).

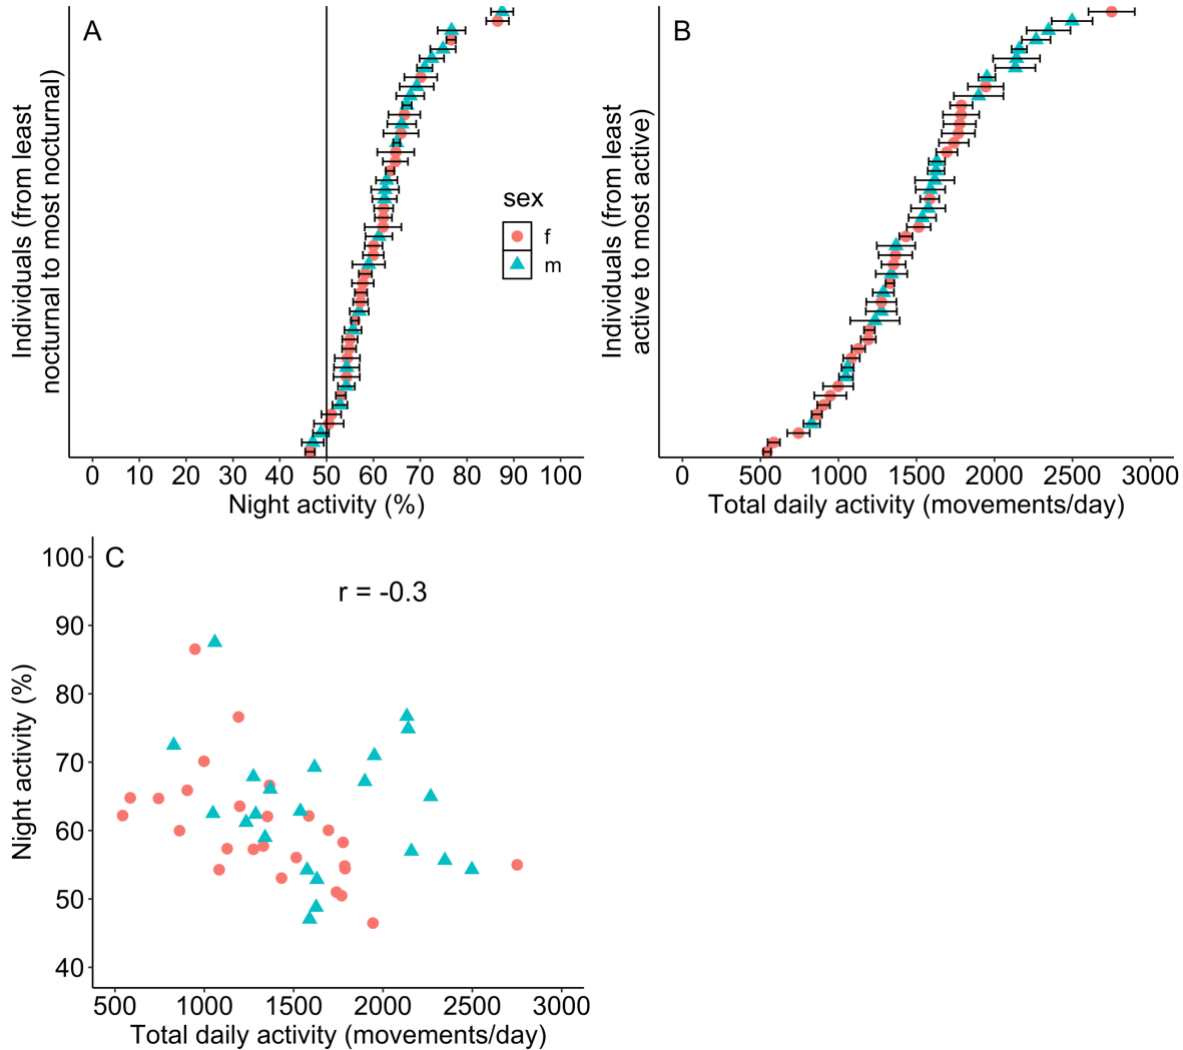

376

377 **Fig. 4. Under LD, sticklebacks are mostly nocturnal, but show large interindividual**  
378 **variation in the phase of activity and in the total daily activity. The most nocturnal**  
379 **are also the least active.** (A) Average night activity of each individual under a 12 h light:12  
380 h dark cycle (LD) for 8 days. Night activity corresponds to the percentage of the total daily  
381 activity displayed during the dark phase. Error bars represent the standard error of the mean.  
382 (B) Average total daily activity (movements/day) of each individual under LD for 8 days. (C)  
383 Correlation between the night activity (%) and the total daily activity (movements/day) under  
384 LD (average for 8 days). Note that axes are not starting at zero. Pearson's correlation test,  
385  $r=-0.3$ ,  $p=0.04$ ,  $n=48$ .

386

### 387 **Clock gene expression rhythms in the brain**

388 We did not find any significant time-of-day variation in the relative expression of *bmal1a*,  
389 *clock1b*, *clock2*, *per1b* and *cry1b* in the brain of sticklebacks (one-way ANOVA,  $p>0.05$ , Fig.



390 5). In addition, the cosinor analysis did not detect any significant circadian rhythmicity in the  
391 relative expression of the five genes (cosinor analysis,  $p > 0.05$ ).  
392

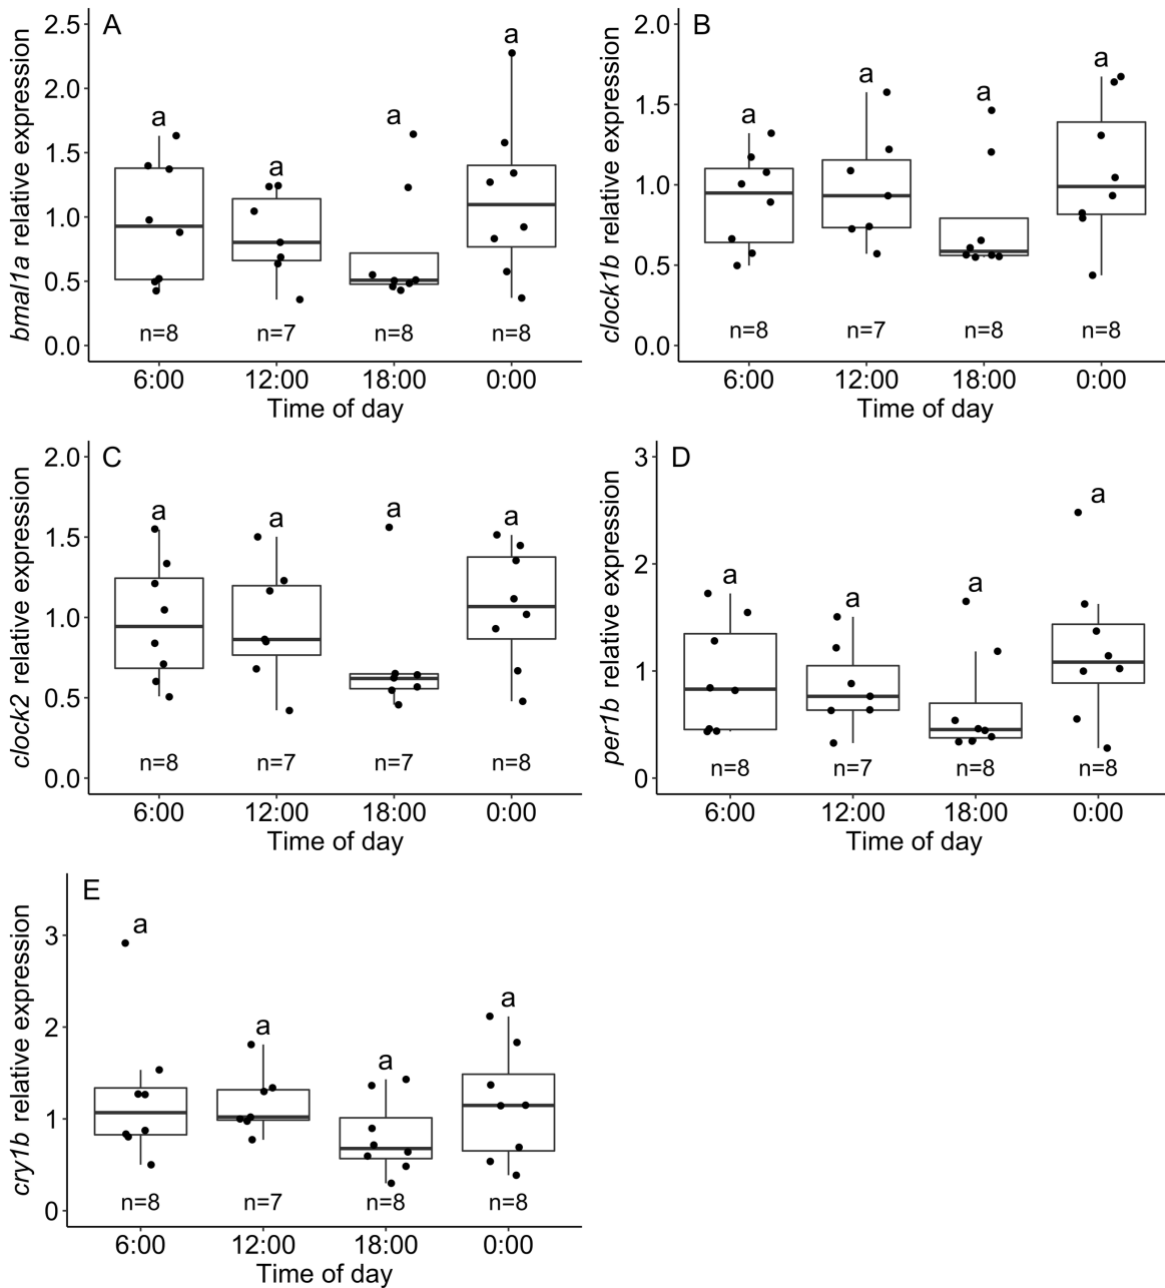

393  
394 **Fig. 5. The expression of clock genes does not significantly vary during a 24-hour**  
395 **period in the brain of sticklebacks in DD.** Time-of-day-dependent relative expression of  
396 *bmal1a* (A), *clock1b* (B), *clock2* (C), *per1b* (D) and *cry1b* (E) measured by qPCR in the brain  
397 of sticklebacks after one day in constant darkness (DD). The letter “a” denotes the absence  
398 of significant difference between time points for the five genes (one-way ANOVA,  $p > 0.05$ ).

399 The black line in the middle of each boxplot indicates the median and each dot represents  
400 an individual. Sample size is shown for each time point.

401

## 402 **DISCUSSION**

403 The circadian clock is an internal timekeeping system shared by almost all living organisms  
404 and has been mostly studied in model organisms. While knowledge about the functional  
405 importance and the evolution of circadian rhythms in natural environments is mounting,  
406 combining studies at the behavioural and molecular levels in individuals from natural  
407 populations but in controlled experimental settings is still in its early phase. In this study,  
408 using wild-caught sticklebacks, we investigated the circadian clock of this species at the  
409 behavioural and molecular levels. Our first objective was to determine if the daily rhythm of  
410 locomotor activity is under circadian clock control using a manipulation of the photoperiod.  
411 Under LD, all fish exhibited significant daily rhythmicity, while under DD, only a few  
412 individuals remained rhythmic. This result indicates that the circadian clock controls the  
413 locomotor activity rhythm in only a few sticklebacks, revealing a noteworthy interindividual  
414 variation. Our second objective was to determine the phase of activity of sticklebacks under  
415 LD. Contrary to our hypothesis, sticklebacks were mostly nocturnal. However, we observed  
416 again large interindividual variation: some fish were almost exclusively nocturnal while  
417 others were just slightly more active during the night than during the day. This variation was  
418 negatively correlated with the total daily activity, meaning that the most nocturnal fish were  
419 also the least active. This result suggests that light suppresses activity more strongly in  
420 some individuals, making them the most nocturnal fish. Our third objective was to describe  
421 the molecular oscillation of five clock genes (*bmal1a*, *clock1b*, *clock2*, *per1b* and *cry1b*) in  
422 the brain of sticklebacks under DD. Contrary to our hypothesis, we reported a lack of  
423 circadian rhythmicity for the five genes in the brain, which could either indicate that clock  
424 gene expression is not endogenously controlled, or that there was a significant oscillation  
425 but that we were unable to detect it, as a result of the large biological variation observed  
426 among individuals or because of technical issues.

427

### 428 **Locomotor activity rhythm under constant darkness**

429 We found striking interindividual variation in circadian rhythms of activity in threespine  
430 sticklebacks. Our finding that not all individuals display a significant circadian rhythm of  
431 locomotor activity has been reported previously in other fish species. For instance, under  
432 constant conditions (constant darkness or light), the percentage of rhythmic individuals was

433 57% in goldfish (*Carassius auratus*, Iigo and Tabata, 1996), 50% in Nile tilapia (*Oreochromis*  
434 *niloticus*, Vera et al., 2009), 42% in tench (*Tinca tinca*, Herrero et al., 2003) and 30% in  
435 sharpnose seabream (*Diplodus puntazzo*, Vera et al., 2006). In our experiment, 18% of  
436 sticklebacks were rhythmic in DD. Thus, a lack of circadian control on the locomotor activity  
437 rhythm seems common in fish. An advantage of not being under the strict control of the  
438 circadian clock could be that it allows the fish to rapidly adjust their phase of activity when  
439 critical changes occur in the environment, such as a shift in food availability, predation risk,  
440 mating opportunities, presence of parasites, etc. This is demonstrated by jet lag in animals  
441 that are strongly influenced by their internal clock, such as humans: it takes several days to  
442 adjust the phase of activity to a new environment and this re-entrainment is associated with  
443 many negative effects on health and cognitive performance (Waterhouse et al., 2007). Thus,  
444 in fish populations facing a particularly fluctuating environment, the individuals may benefit  
445 from being flexible and able to adjust their phase of activity, rather than their activity being  
446 rigidly controlled by their internal timekeeping system. For instance, the stickleback  
447 population in lac Témiscouata has to cope with several aquatic and avian predators  
448 (Reimchen, 1994; Tessier et al., 2008). All these fish and birds likely forage at various  
449 moments during the day and might themselves change their phase of activity according to  
450 various environmental factors or throughout the year. Sticklebacks thus probably must deal  
451 with many conflictual – and sometimes unpredictable – daily patterns in predation risk.  
452 Indeed, the lac Témiscouata population shows strong anti-predator morphology and  
453 behaviour, even when laboratory-reared (Lacasse and Aubin-Horth, 2012). Having a flexible  
454 daily schedule could further help sticklebacks to deal with several types of predators. On the  
455 other hand, the fact that some individuals kept an activity rhythm in constant darkness  
456 highlights that the extensive interindividual variation seen in many traits in sticklebacks, such  
457 as personality (Huntingford, 1976; Bell, 2005; Aubin-Horth et al., 2012), is also present in  
458 their circadian rhythms. Whether the variation quantified in these wild individuals arises from  
459 genetic variation or developmental plasticity in their early environment will need to be tested  
460 using common-environment experiments (Greenwood et al., 2011; Di-Poi et al., 2014). This  
461 interindividual variation suggests the hypothesis that there is more than one successful way  
462 to regulate its daily activities in that environment.

463

464 For the majority of the individuals that were not rhythmic in constant darkness, a lack of  
465 circadian regulation does not mean that they do not have a functional clock. It is possible  
466 that the clock molecular oscillator is partially uncoupled from the effectors, e.g. the locomotor

467 system. For instance, uncoupling between clock gene expression rhythm and behavioural  
468 rhythm have been reported in the Mexican blind cavefish (*Astyanax mexicanus*, Beale et al.,  
469 2013). Similarly, the neuronal activity in the suprachiasmatic nucleus (the clock master  
470 oscillator in mammals) of guinea pigs (*Cavia porcellus*) shows robust circadian rhythmicity,  
471 but the animals express very unclear and weak activity rhythm (Kurumiya and Kawamura,  
472 1988). It is thus possible that daily activities are not regulated by the clock molecular  
473 oscillator in sticklebacks as well. If this is the case, other behaviours, or physiological  
474 processes – such as the daily variation in the melatonin level – would be expected to be  
475 controlled by the circadian clock. It is also possible that other environmental factors entrain  
476 the circadian clock of sticklebacks. For instance, food availability was shown to entrain  
477 circadian locomotor activity rhythms in goldfish (*Carassius auratus*, Sánchez-Vázquez et al.,  
478 1997), tench (*Tinca tinca*, Herrero et al., 2005) and zebrafish (*Danio rerio*, Lopez-Olmeda et  
479 al., 2010). In our study, sticklebacks could only be entrained by the light-dark cycle since  
480 they were fed at random time and all other environmental cues were held constant. In future  
481 studies, asking whether other environmental factors can entrain circadian rhythms in  
482 sticklebacks would help us to understand what temporal cues are important for these fish in  
483 their natural environment. Alternatively, the photoperiodic conditions we used might have  
484 been inadequate and it could have led us to mistakenly think that the light-dark cycle could  
485 entrain the circadian clock in only a few sticklebacks. For instance, under LD, transitions  
486 between the light and the dark phases were very sudden, which is obviously not the case in  
487 nature since the sun sets and rises progressively. The sharp increase in activity observed  
488 every day just after the lights were turned off might indicate that this event was stressful for  
489 the fish. In future experiments, using a light gradient at sunrise and at sunset could help to  
490 better reproduce natural conditions (ex.: Lazado et al., 2014).

491

#### 492 **Masking effect of light and phase of activity under light-dark cycle**

493 Having established that the locomotor activity rhythm of sticklebacks is not controlled by the  
494 internal clock in most individuals, our results suggest that the masking effect of light  
495 contributes to the significant daily rhythm that we observed for all fish under LD. The masking  
496 effect of light refers to the direct influence of the photic signal on an organism's behaviour,  
497 that is to say without the entrainment of its internal clock (Mrosovsky, 1999). As sticklebacks  
498 were generally more nocturnal under LD, the masking effect of light should suppress activity  
499 in this species (Mrosovsky, 1999). This is exactly what we observed: sticklebacks were less  
500 active during the light phase in LD than during the subjective light phase in DD (same hours

501 of the day but different lighting conditions). This result indicates that light suppresses activity  
502 in sticklebacks, the definition of a masking effect.

503

504 We had hypothesized that sticklebacks are diurnal based on the fact that their visual opsins  
505 (Rennison et al., 2012) correspond to those of diurnal fish (Carleton et al., 2020) and that  
506 they are mostly captured during the day in the wild (Worgan and FitzGerald, 1981; Sjöberg,  
507 1985; Reebbs et al., 1995). However, we found that sticklebacks were, on average, mostly  
508 nocturnal under LD. The fact that some fish were almost strictly nocturnal suggests that  
509 sticklebacks can find food at night, either using visual or chemical cues (which has already  
510 been suggested by Mussen and Peeke, 2001). Whether sticklebacks do perform night  
511 activity in the wild is not known and might depend on several factors. In the laboratory, some  
512 sticklebacks might have chosen to be active during the night because they did not need to  
513 extensively rely on their visual system to find food (as their tank was quite small) and  
514 because they perceived the dark phase as safer. It has been previously shown in some  
515 species that there can be differences between the phase of daily activity in the laboratory  
516 and in the natural environment (reviewed in Calisi and Bentley, 2009). For instance, while  
517 mice (*Mus musculus*) are known for their nocturnal behaviour in the lab, they show variable  
518 phases of activity and are sometimes even exclusively diurnal when they are held in a semi-  
519 natural environment (Daan et al., 2011). Therefore, it is possible that sticklebacks are  
520 nocturnal in the lab and diurnal in their natural environment, and this could be verified using  
521 acoustic telemetry (March et al., 2010; Hussey et al., 2015; Alós et al., 2017).

522

523 We reported large interindividual variation in the phase of activity under LD. Interindividual  
524 differences in the phase of activity have often been reported in fish (reviewed in Reebbs,  
525 2002). For example, under LD, some Nile tilapia (*Oreochromis niloticus*) are diurnal, others  
526 are nocturnal, and some are active around the clock (Vera et al., 2009). Similar behaviours  
527 have been reported in goldfish (*Carassius auratus*, Iigo and Tabata, 1996) and in Atlantic  
528 salmon (*Salmo salar*, Richardson and McCleave, 1974). In line with these results, we  
529 showed that some sticklebacks were clearly nocturnal under LD, while others displayed an  
530 unclear phase of activity and were just slightly more active during the night than during the  
531 day. Large interindividual variation in the phase of daily activity thus also seems common in  
532 fish. In this study, we also observed that sticklebacks who restricted their daily activity to the  
533 dark phase were also the least active. The masking effect of light could thus be involved:  
534 some fish were more nocturnal because light suppressed their activity more strongly than

535 that of the other fish. Observation of less active individuals in wild populations has already  
536 been reported in other fish species (Slavík and Horký, 2012; Závorka et al., 2016; Alós et  
537 al., 2017). Moreover, in accordance with our results, it has been shown that the less active  
538 fish react more to variations in light intensity than the more active individuals in wild brown  
539 trout juveniles (*Salmo trutta*) (Závorka et al., 2016). The ultimate cause of this interindividual  
540 variation is not known, but it could be that some fish have less energy to invest in activity  
541 and need to optimize the timing of their daily activity. They would thus benefit from being  
542 strongly affected by the light signal because it would allow them to only be active at the most  
543 optimal time of the day, which seems to be during the night for sticklebacks in our  
544 experiment. We must also consider the fact that our activity measure may be affected by a  
545 technical issue. The photoelectric sensors used only covered a portion of the tanks.  
546 Thigmotaxis or “wall-hugging” is a stress-related behaviour found in fish as in mammals  
547 (Maximino et al., 2010). If some individuals were more anxious than others in our study, they  
548 might have swum very close to the wall of their tank and been less detected by the sensor.  
549 Moreover, if some fish perceived the light phase as riskier, their thigmotaxis behaviour might  
550 have been more pronounced during the day than during the night. Therefore, the fish that  
551 we detected as less active and more nocturnal might have been as active as the other fish  
552 and active around the clock like the other fish, the only difference being that they would have  
553 spent more time swimming close to the wall of their tank during the day. In future  
554 experiments, this bias could be avoided by using more than one photoelectric sensor on  
555 each tank. Under LD, we also observed a significant sex difference in the total daily activity:  
556 males were more active than females. We reported that light did not suppress activity  
557 differently between sexes, so the masking effect of light is not in cause. One potential  
558 explanation is that males invest more energy in their daily activities because they have a  
559 higher energetic demand (Chmura et al., 2020) and forage more than females to find food  
560 in their tank. Another potential explanation is that if males were less anxious than females  
561 in our study, our activity monitoring system might have detected them more (as explained  
562 above). Lower anxiety levels in males than in females have been reported, for instance, in  
563 humans (Donner and Lowry, 2013) and in fish (Fontana et al., 2020). In summary, our results  
564 suggest that circadian and daily locomotor activity rhythms display large interindividual  
565 variation in sticklebacks, which seems to be a common feature in fish (Reebs, 2002). As  
566 mammals tend to exhibit more robust circadian behavioural rhythms (although there are  
567 exceptions: Bloch et al., 2013; Hazlerigg and Tyler, 2019), our study highlights the

568 importance of investigating a wide diversity of species to better understand the evolution of  
569 circadian clocks.

570

### 571 **Clock gene expression rhythms in the brain**

572 We did not detect any significant circadian rhythmicity in the relative expression of core clock  
573 genes in the brain of sticklebacks under constant darkness (DD), which suggests that either  
574 the molecular oscillator is highly light-dependent or that there was a significant oscillation  
575 but we were unable to detect it. The first interpretation implies that clock gene expression  
576 rhythms are not endogenously controlled, which contrasts with what has been observed in  
577 the brain or neural tissues of many other fish species (Whitmore et al., 1998; Cermakian et  
578 al., 2000; Patiño et al., 2011; Vera et al., 2013; Moore and Whitmore, 2014; Costa et al.,  
579 2016; Ceinos et al., 2019). A more parsimonious explanation is that a biological or technical  
580 effect prevented us from detecting any significant rhythmicity. First, it is possible that  
581 sticklebacks displayed interindividual variation in their acrophases (i.e. different peak times)  
582 of clock gene expression, so that the variation at each time point was too great to allow  
583 detection of a significant rhythm. Interestingly, interindividual variation in peak times of clock  
584 gene expression is often reported in natural populations, for example in humans (Teboul et  
585 al., 2005; Nováková et al., 2013; Ferrante et al., 2015; Takahashi et al., 2018). In fish, clock  
586 gene expression has not been quantified often in wild-caught populations, with the notable  
587 exception of the Mexican cavefish (*Astyanax mexicanus*) (Beale et al., 2013). Without  
588 surprise, it was shown that a wild population of Mexican cavefish displayed greater  
589 interindividual variation in clock gene expression than a laboratory population, a result that  
590 could be explained by greater genetic variation in the wild population (Beale et al., 2013).  
591 To demonstrate that wild sticklebacks display different peak times of clock gene expression,  
592 the same fish would have to be sampled multiple times over a 24-h period. As the sampling  
593 would need not to be lethal, using fin samples could be considered (Cavallari et al., 2011;  
594 Beale et al., 2013; Mogi et al., 2017).

595

596 Technical issues could also explain the fact that we did not detect significant circadian  
597 rhythmicity. We quantified clock gene expression in the whole brain, but if different regions  
598 of the stickleback brain host independent molecular oscillators that display different  
599 circadian rhythms or if some brain tissues are arrhythmic, using the whole brain might have  
600 drowned the rhythmic signal. For instance, previous studies in mammals reported that the  
601 same clock gene can have various peak times of expression in different brain regions (Abe

602 et al., 2002; Mure et al., 2018). In fish, few studies have quantified clock gene expression in  
603 different brain regions, the size of this organ often being limiting. Among those who did,  
604 some reported distinct expression peaks between brain regions (Cermakian et al., 2000;  
605 Huang et al., 2010), but several others rather observed similar expression peaks throughout  
606 the brain (Whitmore et al., 1998; Weger et al., 2013; Moore and Whitmore, 2014; Costa et  
607 al., 2016). Besides, whole brains have often been used successfully to quantify clock gene  
608 expression rhythms in fish, both under LD (Lopez-Olmeda et al., 2010; Sánchez et al., 2010;  
609 Wang et al., 2015; Tudorache et al., 2018) and under DD (Whitmore et al., 1998; Cermakian  
610 et al., 2000; Vera et al., 2013; Moore and Whitmore, 2014). It thus seems that we could have  
611 detected significant rhythmicity using the whole brain of sticklebacks. That being said, in  
612 future studies, it would be possible to sample specific regions of the stickleback brain such  
613 as the diencephalon (which contains the hypothalamus) and the midbrain (which contains  
614 the optic tectum) (Sanogo et al., 2012; Greenwood and Peichel, 2015; Bell et al., 2016).  
615 These regions have been used a few times to quantify clock gene expression rhythms in  
616 other fish species (Feliciano et al., 2011; Martín-Robles et al., 2012; Moore and Whitmore,  
617 2014; Costa et al., 2016). Another possibility would be to sample other organs such as the  
618 heart and the liver, which are commonly used to study the clock molecular oscillator in fish  
619 (Sánchez et al., 2010; Cavallari et al., 2011; Wang et al., 2015).

620

621 In this study, we showed that there is interindividual variation in the circadian rhythm of  
622 locomotor activity in wild sticklebacks, with most individuals exhibiting activity not controlled  
623 by their clock. In addition, we found that sticklebacks were mostly nocturnal under LD, but  
624 we observed large interindividual variation that could be due to a differential response to the  
625 masking effect of light among individuals. In future studies, asking whether a lack of  
626 circadian control is common in wild populations of sticklebacks or if it is driven by specific  
627 environmental challenges (such as high predation risk) will allow to better understand what  
628 selection pressures can shape the evolution of circadian rhythms. Moreover, assessing  
629 whether other biological rhythms are more strongly controlled by the clock and if the  
630 stickleback circadian system can be entrained by other environmental factors (such as food  
631 availability) will inform us about the functional importance of the circadian clock in this  
632 species. In parallel, studying the molecular oscillator will tell us what clock mechanisms  
633 underlie potential differences in circadian rhythms between populations and individuals.  
634 Importantly, in the study of gene expression, interindividual variation will need to be  
635 addressed and the choice of target organs used to quantify clock gene expression will affect



636 the capacity to detect significant rhythmicity. Overall, our study suggests that a strong  
637 circadian control on behavioural rhythms is not necessarily advantageous in a natural  
638 population of sticklebacks and that the masking effect of light is potentially responsible for  
639 the large interindividual variation in the daily phase of activity.

640

#### 641 **Acknowledgments**

642 The authors would like to thank Dany Turcotte from Westburne Canada for his valuable  
643 advice regarding the photoelectric sensors and for graciously volunteering his time to  
644 program the controller. We thank Verônica A. Alves and Morgane Philippe for the field work,  
645 Sann Delaive for its help with tissue sampling and the personnel of the LARSEM at  
646 Université Laval for their help with fish rearing. We thank Chloé S. Berger, Florent Sylvestre  
647 and Verônica A. Alves for their comments on previous versions of this manuscript. We also  
648 thank Nicolas Cermakian for his valuable advice on this research.

649

#### 650 **Competing interests**

651 The authors declare no competing or financial interests.

652

#### 653 **Funding**

654 This project was funded by a Natural Sciences and Engineering Research Council of  
655 Canada (NSERC) Discovery Grant to Nadia Aubin-Horth, and by a NSERC Graduate  
656 Scholarship and a Fonds de recherche du Québec Nature et technologies (FRQNT)  
657 Scholarship to Marie-Pier Brochu.

## 658 References

- 659 **Abe, M., Herzog, E. D., Yamazaki, S., Straume, M., Tei, H., Sakaki, Y., Menaker, M. and**  
660 **Block, G. D.** (2002). Circadian rhythms in isolated brain regions. *J. Neurosci.* **22**,  
661 350-356.
- 662 **Alós, J., Martorell-Barceló, M. and Campos-Candela, A.** (2017). Repeatability of  
663 circadian behavioural variation revealed in free-ranging marine fish. *R. Soc. open*  
664 *sci.* **4**, 160791.
- 665 **Andersen, C. L., Jensen, J. L. and Ørntoft, T. F.** (2004). Normalization of real-time  
666 quantitative reverse transcription-PCR data: A model-based variance estimation  
667 approach to identify genes suited for normalization, applied to bladder and colon  
668 cancer data sets. *Cancer Res.* **64**, 5245-5250.
- 669 **Aubin-Horth, N., Deschenes, M. and Cloutier, S.** (2012). Natural variation in the molecular  
670 stress network correlates with a behavioural syndrome. *Horm. Behav.* **61**, 140-146.
- 671 **Bayarri, M. J., Muñoz-Cueto, J. A., López-Olmeda, J. F., Vera, L. M., Rol De Lama, M.**  
672 **A., Madrid, J. A. and Sánchez-Vázquez, F. J.** (2004). Daily locomotor activity and  
673 melatonin rhythms in Senegal sole (*Solea senegalensis*). *Physiol. Behav.* **81**, 577-  
674 583.
- 675 **Beale, A., Guibal, C., Tamai, T. K., Klotz, L., Cowen, S., Peyric, E., Reynoso, V. H.,**  
676 **Yamamoto, Y. and Whitmore, D.** (2013). Circadian rhythms in Mexican blind  
677 cavefish *Astyanax mexicanus* in the lab and in the field. *Nat. Commun.* **4**, 2769.
- 678 **Bell, A. M.** (2005). Behavioural differences between individuals and two populations of  
679 stickleback (*Gasterosteus aculeatus*). *J. Evol. Biol.* **18**, 464-473.
- 680 **Bell, A. M., Bukhari, S. A. and Sanogo, Y. O.** (2016). Natural variation in brain gene  
681 expression profiles of aggressive and nonaggressive individual sticklebacks.  
682 *Behaviour* **153**, 1723-1743.
- 683 **Bell, M. A. and Foster, S. A.** (1994). *The Evolutionary Biology of the Threespine*  
684 *Stickleback*. Oxford, UK: Oxford University Press.
- 685 **Bell-Pedersen, D., Cassone, V. M., Earnest, D. J., Golden, S. S., Hardin, P. E., Thomas,**  
686 **T. L. and Zoran, M. J.** (2005). Circadian rhythms from multiple oscillators: lessons  
687 from diverse organisms. *Nat. Rev. Genet.* **6**, 544-556.
- 688 **Bloch, G., Barnes, B. M., Gerkema, M. P. and Helm, B.** (2013). Animal activity around the  
689 clock with no overt circadian rhythms: patterns, mechanisms and adaptive value.  
690 *Proc. R. Soc. B* **280**, 20130019.
- 691 **Calisi, R. M. and Bentley, G. E.** (2009). Lab and field experiments: Are they the same  
692 animal? *Horm. Behav.* **56**, 1-10.
- 693 **Carleton, K. L., Escobar-Camacho, D., Stieb, S. M., Cortesi, F. and Marshall, N. J.**  
694 (2020). Seeing the rainbow: mechanisms underlying spectral sensitivity in teleost  
695 fishes. *J. Exp. Biol.* **223**, jeb193334.
- 696 **Cavallari, N., Frigato, E., Vallone, D., Frohlich, N., Lopez-Olmeda, J. F., Foa, A., Berti,**  
697 **R., Sánchez-Vázquez, F. J., Bertolucci, C. and Foulkes, N. S.** (2011). A blind  
698 circadian clock in cavefish reveals that opsins mediate peripheral clock  
699 photoreception. *PLoS Biol.* **9**, e1001142.
- 700 **Ceinos, R. M., Chivite, M., López-Patiño, M. A., Naderi, F., Soengas, J. L., Foulkes, N.**  
701 **S. and Míguez, J. M.** (2019). Differential circadian and light-driven rhythmicity of  
702 clock gene expression and behaviour in the turbot, *Scophthalmus maximus*. *PLoS*  
703 *One* **14**, e0219153.
- 704 **Cermakian, N., Whitmore, D., Foulkes, N. S. and Sassone-Corsi, P.** (2000).  
705 Asynchronous oscillations of two zebrafish CLOCK partners reveal differential clock  
706 control and function. *Proc. Natl. Acad. Sci. U. S. A.* **97**, 4339-4344.

- 707 **Challet, E.** (2007). Minireview: Entrainment of the suprachiasmatic clockwork in diurnal and  
708 nocturnal mammals. *Endocrinology* **148**, 5648-5655.
- 709 **Chiesa, J. J., Aguzzi, J., García, J. A., Sardà, F. and De La Iglesia, H. O.** (2010). Light  
710 intensity determines temporal niche switching of behavioral activity in deep-water  
711 *Nephrops norvegicus* (Crustacea: Decapoda). *J. Biol. Rhythms* **25**, 277-287.
- 712 **Chmura, H. E., Zhang, V. Y., Wilbur, S. M., Barnes, B. M., Buck, C. L. and Williams, C.**  
713 **T.** (2020). Plasticity and repeatability of activity patterns in free-living Arctic ground  
714 squirrels. *Anim. Behav.* **169**, 81-91.
- 715 **Costa, L. S., Serrano, I., Sánchez-Vázquez, F. J. and López-Olmeda, J. F.** (2016).  
716 Circadian rhythms of clock gene expression in Nile tilapia (*Oreochromis niloticus*)  
717 central and peripheral tissues: influence of different lighting and feeding conditions.  
718 *J. Comp. Physiol. B* **186**, 775-785.
- 719 **Daan, S., Spoelstra, K., Albrecht, U., Schmutz, I., Daan, M., Daan, B., Rienks, F.,**  
720 **Poletaeva, I., Dell'omo, G., Vyssotski, A., et al.** (2011). Lab mice in the field:  
721 Unorthodox daily activity and effects of a dysfunctional circadian clock allele. *J. Biol.*  
722 *Rhythms* **26**, 118-129.
- 723 **Di Poi, C., Belanger, D., Amyot, M., Rogers, S. and Aubin-Horth, N.** (2016). Receptors  
724 rather than signals change in expression in four physiological regulatory networks  
725 during evolutionary divergence in threespine stickleback. *Mol. Ecol.* **25**, 3416-3427.
- 726 **Di-Poi, C., Lacasse, J., Rogers, S. M. and Aubin-Horth, N.** (2014). Extensive behavioural  
727 divergence following colonisation of the freshwater environment in threespine  
728 sticklebacks. *PLoS One* **9**, e98980.
- 729 **Dominoni, D. M., Åkesson, S., Klaassen, R., Spoelstra, K. and Bulla, M.** (2017). Methods  
730 in field chronobiology. *Philos. Trans. R. Soc. Lond. B Biol. Sci.* **372**, 20160247.
- 731 **Donner, N. C. and Lowry, C. A.** (2013). Sex differences in anxiety and emotional behavior.  
732 *Pflugers Arch.* **465**, 601-626.
- 733 **Falcón, J., Besseau, L., Fuentès, M., Sauzet, S., Magnanou, E. and Boeuf, G.** (2009).  
734 Structural and functional evolution of the pineal melatonin system in vertebrates.  
735 *Ann. N. Y. Acad. Sci.* **1163**, 101-111.
- 736 **Feliciano, A., Vivas, Y., De Pedro, N., Delgado, M. J., Velarde, E. and Isorna, E.** (2011).  
737 Feeding time synchronizes clock gene rhythmic expression in brain and liver of  
738 goldfish (*Carassius auratus*). *J. Biol. Rhythms* **26**, 24-33.
- 739 **Ferrante, A., Gellerman, D., Ay, A., Woods, K. P., Filipowicz, A. M., Jain, K., Bearden,**  
740 **N. and Ingram, K. K.** (2015). Diurnal preference predicts phase differences in  
741 expression of human peripheral circadian clock genes. *J. Circadian Rhythms* **13**, 1-  
742 7.
- 743 **Fontana, B. D., Cleal, M. and Parker, M. O.** (2020). Female adult zebrafish (*Danio rerio*)  
744 show higher levels of anxiety-like behavior than males, but do not differ in learning  
745 and memory capacity. *Eur. J. Neurosci.* **52**, 2604-2613.
- 746 **Fuchikawa, T., Eban-Rothschild, A., Nagari, M., Shemesh, Y. and Bloch, G.** (2016).  
747 Potent social synchronization can override photic entrainment of circadian rhythms.  
748 *Nat. Commun.* **7**, 11662.
- 749 **Gao, K., Brandt, I., Goldstone, J. V. and Jönsson, M. E.** (2011). Cytochrome P450 1A,  
750 1B, and 1C mRNA induction patterns in three-spined stickleback exposed to a  
751 transient and a persistent inducer. *Comp. Biochem. Physiol. C Toxicol. Pharmacol.*  
752 **154**, 42-55.
- 753 **Greenwood, A. K., Jones, F. C., Chan, Y. F., Brady, S. D., Absher, D. M., Grimwood, J.,**  
754 **Schmutz, J., Myers, R. M., Kingsley, D. M. and Peichel, C. L.** (2011). The genetic  
755 basis of divergent pigment patterns in juvenile threespine sticklebacks. *Heredity* **107**,  
756 155-166.

- 757 **Greenwood, A. K. and Peichel, C. L.** (2015). Social regulation of gene expression in  
758 threespine sticklebacks. *PLoS One* **10**, e0137726-e0137726.
- 759 **Hanson, D., Hu, J., Hendry, A. P. and Barrett, R. D. H.** (2017). Heritable gene expression  
760 differences between lake and stream stickleback include both parallel and  
761 antiparallel components. *Heredity* **119**, 339-348.
- 762 **Hazlerigg, D. G. and Tyler, N. J. C.** (2019). Activity patterns in mammals: Circadian  
763 dominance challenged. *PLoS Biol.* **17**, e3000360.
- 764 **Helm, B., Visser, M. E., Schwartz, W., Kronfeld-Schor, N., Gerkema, M., Piersma, T.  
765 and Bloch, G.** (2017). Two sides of a coin: ecological and chronobiological  
766 perspectives of timing in the wild. *Philos. Trans. R. Soc. Lond. B Biol. Sci.* **372**,  
767 20160246.
- 768 **Herrero, M. J., Madrid, J. A. and Sánchez-Vázquez, F. J.** (2003). Entrainment to light of  
769 circadian activity rhythms in tench (*Tinca tinca*). *Chronobiol. Int.* **20**, 1001-17.
- 770 **Herrero, M. J., Pascual, M., Madrid, J. A. and Sánchez-Vázquez, F. J.** (2005). Demand-  
771 feeding rhythms and feeding-entrainment of locomotor activity rhythms in tench  
772 (*Tinca tinca*). *Physiol. Behav.* **84**, 595-605.
- 773 **Hibbeler, S., Scharsack, J. P. and Becker, S.** (2008). Housekeeping genes for quantitative  
774 expression studies in the three-spined stickleback *Gasterosteus aculeatus*. *BMC*  
775 *Mol. Biol.* **9**, 18.
- 776 **Huang, T.-S., Ruoff, P. and Fjellidal, P. G.** (2010). Effect of continuous light on daily levels  
777 of plasma melatonin and cortisol and expression of clock genes in pineal gland,  
778 brain, and liver in Atlantic salmon postsmolts. *Chronobiol. Int.* **27**, 1715-1734.
- 779 **Huntingford, F. A.** (1976). The relationship between anti-predator behaviour and  
780 aggression among conspecifics in the three-spined stickleback, *Gasterosteus*  
781 *Aculeatus*. *Anim. Behav.* **24**, 245-260.
- 782 **Hussey, N. E., Kessel, S. T., Aarestrup, K., Cooke, S. J., Cowley, P. D., Fisk, A. T.,  
783 Harcourt, R. G., Holland, K. N., Iverson, S. J., Kocik, J. F., et al.** (2015). Aquatic  
784 animal telemetry: A panoramic window into the underwater world. *Science* **348**,  
785 1255642.
- 786 **Hut, R. A., Kronfeld-Schor, N., Van Der Vinne, V. and De La Iglesia, H.** (2012). In search  
787 of a temporal niche: Environmental factors. In *Progress in Brain Research* (ed. A.  
788 Kalsbeek, M. Meroow, T. Roenneberg and R. G. Foster), pp. 281-304. Oxford, UK:  
789 Elsevier.
- 790 **Iigo, M. and Tabata, M.** (1996). Circadian rhythms of locomotor activity in the goldfish  
791 *Carassius auratus*. *Physiol. Behav.* **60**, 775-81.
- 792 **Ishikawa, A., Kabeya, N., Ikeya, K., Kakioka, R., Cech, J. N., Osada, N., Leal, M. C.,  
793 Inoue, J., Kume, M., Toyoda, A., et al.** (2019). A key metabolic gene for recurrent  
794 freshwater colonization and radiation in fishes. *Science* **364**, 886-889.
- 795 **Kassambara, A.** (2020). rstatix: Pipe-friendly framework for basic statistical tests. R  
796 package version 0.5.0.
- 797 **Kitano, J., Lema, S. C., Luckenbach, J. A., Mori, S., Kawagishi, Y., Kusakabe, M.,  
798 Swanson, P. and Peichel, C. L.** (2010). Adaptive divergence in the thyroid hormone  
799 signaling pathway in the stickleback radiation. *Curr. Biol.* **20**, 2124-2130.
- 800 **Kronfeld-Schor, N., Bloch, G. and Schwartz, W. J.** (2013). Animal clocks: when science  
801 meets nature. *Proc. R. Soc. B* **280**, 20131354.
- 802 **Kulczykowska, E., Kleszczyńska, A., Gozdowska, M. and Sokołowska, E.** (2017). The  
803 time enzyme in melatonin biosynthesis in fish: Day/night expressions of three  
804 aralkylamine N-acetyltransferase genes in three-spined stickleback. *Comp.*  
805 *Biochem. Physiol. A Mol. Integr. Physiol.* **208**, 46-53.
- 806 **Kumar, V.** (2017). *Biological Timekeeping: Clocks, Rhythms and Behaviour*. New Delhi,  
807 India: Springer India.

- 808 **Kurumiya, S. and Kawamura, H.** (1988). Circadian oscillation of the multiple unit activity in  
809 the guinea pig suprachiasmatic nucleus. *J. Comp. Physiol. A* **162**, 301-308.
- 810 **Lacasse, J. and Aubin-Horth, N.** (2012). A test of the coupling of predator defense  
811 morphology and behavior variation in two threespine stickleback populations. *Curr.*  
812 *Zool.* **58**, 53-65.
- 813 **Lazado, C. C., Kumaratunga, H. P. S., Nagasawa, K., Babiak, I., Giannetto, A. and**  
814 **Fernandes, J. M. O.** (2014). Daily rhythmicity of clock gene transcripts in atlantic  
815 cod fast skeletal muscle. *PLoS One* **9**, e99172.
- 816 **Liu, C., Hu, J., Qu, C., Wang, L., Huang, G., Niu, P., Zhong, Z., Hong, F., Wang, G.,**  
817 **Postlethwait, J. H., et al.** (2015). Molecular evolution and functional divergence of  
818 zebrafish (*Danio rerio*) cryptochrome genes. *Sci. Rep.* **5**, 8113.
- 819 **Lopez-Olmeda, J. F., Tartaglione, E. V., De La Iglesia, H. O. and Sánchez-Vázquez, F.**  
820 **J.** (2010). Feeding entrainment of food-anticipatory activity and *per1* expression in  
821 the brain and liver of zebrafish under different lighting and feeding conditions.  
822 *Chronobiol. Int.* **27**, 1380-1400.
- 823 **March, D., Palmer, M., Alós, J., Grau, A. and Cardona, F.** (2010). Short-term residence,  
824 home range size and diel patterns of the painted comber *Serranus scriba* in a  
825 temperate marine reserve. *Mar. Ecol. Prog. Ser.* **400**, 195-206.
- 826 **Martín-Robles, Á. J., Whitmore, D., Sánchez-Vázquez, F. J., Pendón, C. and Muñoz-**  
827 **Cueto, J. A.** (2012). Cloning, tissue expression pattern and daily rhythms of *Period1*,  
828 *Period2*, and *Clock* transcripts in the flatfish Senegalese sole, *Solea senegalensis*.  
829 *J. Comp. Physiol. B* **182**, 673-685.
- 830 **Maximino, C., De Brito, T. M., Da Silva Batista, A. W., Herculano, A. M., Morato, S. and**  
831 **Gouveia, A.** (2010). Measuring anxiety in zebrafish: A critical review. *Behav. Brain*  
832 *Res.* **214**, 157-171.
- 833 **Mayer, I., Bornestaf, C., Wetterberg, L. and Borg, B.** (1997). Melatonin does not prevent  
834 long photoperiod stimulation of secondary sexual characters in the male three-  
835 spined stickleback *Gasterosteus aculeatus*. *Gen. Comp. Endocrinol.* **108**, 386-394.
- 836 **Mckinnon, J. S., Kitano, J. and Aubin-Horth, N.** (2019). *Gasterosteus*, *Anolis*, *Mus*, and  
837 more- the changing roles of vertebrate models in evolution and behaviour. *Evol. Ecol.*  
838 *Res.* **20**, 1-25.
- 839 **Mogi, M., Yokoi, H. and Suzuki, T.** (2017). Analyses of the cellular clock gene expression  
840 in peripheral tissue, caudal fin, in the Japanese flounder, *Paralichthys olivaceus*.  
841 *Gen. Comp. Endocrinol.* **248**, 97-105.
- 842 **Moore, H. A. and Whitmore, D.** (2014). Circadian rhythmicity and light sensitivity of the  
843 zebrafish brain. *PLoS One* **9**, e86176.
- 844 **Mrosovsky, N.** (1999). Masking: history, definitions, and measurement. *Chronobiol. Int.* **16**,  
845 415-429.
- 846 **Mure, L. S., Le, H. D., Benegiamo, G., Chang, M. W., Rios, L., Jillani, N., Ngotho, M.,**  
847 **Kariuki, T., Dkhissi-Benyahya, O., Cooper, H. M., et al.** (2018). Diurnal  
848 transcriptome atlas of a primate across major neural and peripheral tissues. *Science*  
849 **359**, eaao0318.
- 850 **Mussen, T. D. and Peeke, H. V. S.** (2001). Nocturnal feeding in the marine threespine  
851 stickleback (*Gasterosteus aculeatus* L.): Modulation by chemical stimulation.  
852 *Behaviour* **138**, 857-871.
- 853 **Mutak, A.** (2018). *cosinor2*: Extended tools for cosinor analysis of rhythms. R package  
854 version 0.2.1.
- 855 **Nováková, M., Sládek, M. and Sumová, A.** (2013). Human chronotype is determined in  
856 bodily cells under real-life conditions. *Chronobiol. Int.* **30**, 607-617.
- 857 **Ostlund-Nilsson, S., Mayer, I. and Huntingford, F. A.** (2007). *Biology of the Three-Spined*  
858 *Stickleback*. Boca Raton, FL, US: CRC Press.

- 859 **Pando, M. P., Pinchak, A. B., Cermakian, N. and Sassone-Corsi, P.** (2001). A cell-based  
860 system that recapitulates the dynamic light-dependent regulation of the vertebrate  
861 clock. *Proc. Natl. Acad. Sci. U. S. A.* **98**, 10178-10183.
- 862 **Patiño, M. a. L., Rodríguez-Illamola, A., Conde-Sieira, M., Soengas, J. L. and Míguez,**  
863 **J. M.** (2011). Daily rhythmic expression patterns of *Clock1a*, *Bmal1*, and *Per1* genes  
864 in retina and hypothalamus of the rainbow trout, *Oncorhynchus mykiss*. *Chronobiol.*  
865 *Int.* **28**, 381-389.
- 866 **Peichel, C. L., Ross, J. A., Matson, C. K., Dickson, M., Grimwood, J., Schmutz, J.,**  
867 **Myers, R. M., Mori, S., Schluter, D. and Kingsley, D. M.** (2004). The master sex-  
868 determination locus in threespine sticklebacks is on a nascent Y chromosome. *Curr.*  
869 *Biol.* **14**, 1416-1424.
- 870 **Pellman, B. A., Kim, E., Reilly, M., Kashima, J., Motch, O., De La Iglesia, H. O. and Kim,**  
871 **J. J.** (2015). Time-specific fear acts as a non-photic entraining stimulus of circadian  
872 rhythms in rats. *Sci. Rep.* **5**, 14916.
- 873 **Pfaffl, M. W.** (2001). A new mathematical model for relative quantification in real-time RT-  
874 PCR. *Nucleic Acids Res.* **29**, e45.
- 875 **Pomianowski, K., Gozdowska, M., Burzyński, A., Kalamarz-Kubiak, H., Sokołowska,**  
876 **E., Kijewska, A. and Kulczykowska, E.** (2020). A study of *aanat* and *asmt*  
877 expression in the three-spined stickleback eye and skin: Not only “on the way to  
878 melatonin”. *Comp. Biochem. Physiol. A Mol. Integr. Physiol.* **241**, 110635.
- 879 **Prokkola, J. M., Nikinmaa, M., Lubiana, P., Kanerva, M., Mccairns, R. J. S. and Gotting,**  
880 **M.** (2015). Hypoxia and the pharmaceutical diclofenac influence the circadian  
881 responses of three-spined stickleback. *Aquat. Toxicol.* **158**, 116-124.
- 882 **Quinn, T. P., Sergeant, C. J., Beaudreau, A. H. and Beauchamp, D. A.** (2012). Spatial  
883 and temporal patterns of vertical distribution for three planktivorous fishes in Lake  
884 Washington. *Ecol. Freshw. Fish* **21**, 337-348.
- 885 **R Core Team** (2020). R: A language and environment for statistical computing. R  
886 Foundation for Statistical Computing.
- 887 **Reeb, S. G.** (2002). Plasticity of diel and circadian activity rhythms in fishes. *Rev. Fish.*  
888 *Biol. Fish.* **12**, 349-371.
- 889 **Reeb, S. G., Boudreau, L., Hardie, R. and Cunjak, R. A.** (1995). Diel activity patterns of  
890 lake chubs and other fishes in a temperate stream. *Can. J. Zool.* **73**, 1221-1227.
- 891 **Reeb, S. G., Jr., F. G. W. and Fitzgerald, G. J.** (1984). Diel patterns of fanning activity,  
892 egg respiration, and the nocturnal behavior of male three-spined sticklebacks,  
893 *Gasterosteus aculeatus* L. (f. *trachurus*). *Can. J. Zool.* **62**, 329-334.
- 894 **Refinetti, R.** (2016). Daily and circadian rhythms. In *Circadian Physiology* (ed. R. Refinetti),  
895 pp. 169-236. Boca Raton: CRC Press.
- 896 **Refinetti, R., Cornelissen, G. and Halberg, F.** (2007). Procedures for numerical analysis  
897 of circadian rhythms. *Biol. Rhythm Res.* **38**, 275-325.
- 898 **Reimchen, T. E.** (1994). Predators and morphological evolution in threespine stickleback.  
899 In *The Evolutionary Biology of the Threespine Stickleback* (ed. A. M. Bell and S. A.  
900 Foster), pp. 240-276. Oxford, UK: Oxford University Press.
- 901 **Rennison, D. J., Owens, G. L. and Taylor, J. S.** (2012). Opsin gene duplication and  
902 divergence in ray-finned fish. *Mol. Phylogenet. Evol.* **62**, 986-1008.
- 903 **Richardson, N. E. and McCleave, J. D.** (1974). Locomotor activity rhythms of juvenile  
904 atlantic salmon (*Salmo salar*) in various light conditions. *Biol. Bull.* **147**, 422-32.
- 905 **Rosensweig, C. and Green, C. B.** (2020). Periodicity, repression, and the molecular  
906 architecture of the mammalian circadian clock. *Eur. J. Neurosci.* **51**, 139-165.
- 907 **Sánchez, J. A., Madrid, J. A. and Sánchez-Vázquez, F. J.** (2010). Molecular cloning,  
908 tissue distribution, and daily rhythms of expression of *per1* gene in European sea  
909 bass (*Dicentrarchus labrax*). *Chronobiol. Int.* **27**, 19-33.

- 910 **Sánchez-Vázquez, F. J., Madrid, J. A., Zamora, S. and Tabata, M.** (1997). Feeding  
911 entrainment of locomotor activity rhythms in the goldfish is mediated by a feeding-  
912 entrainable circadian oscillator. *J. Comp. Physiol. A* **181**, 121-132.
- 913 **Sanogo, Y. O., Band, M., Blatti, C., Sinha, S. and Bell, A. M.** (2012). Transcriptional  
914 regulation of brain gene expression in response to a territorial intrusion. *Proc. R. Soc.*  
915 *B* **279**, 4929-4938.
- 916 **Sanogo, Y. O., Hankison, S., Band, M., Obregon, A. and Bell, A. M.** (2011). Brain  
917 transcriptomic response of threespine sticklebacks to cues of a predator. *Brain*  
918 *Behav. Evol.* **77**, 270-285.
- 919 **Schmid, B., Helfrich-Förster, C. and Yoshii, T.** (2011). A new ImageJ plug-in “ActogramJ”  
920 for chronobiological analyses. *J. Biol. Rhythms* **26**, 464-467.
- 921 **Schwartz, W. J., Helm, B. and Gerkema, M. P.** (2017). Wild clocks: preface and glossary.  
922 *Philos. Trans. R. Soc. Lond. B Biol. Sci.* **372**, 20170211.
- 923 **Sevenster, P., Bruijn, E. F.-D. and Huisman, J. J.** (1995). Temporal structure in  
924 stickleback behaviour. *Behaviour* **132**, 1267-1284.
- 925 **Sjoberg, K.** (1985). Foraging activity patterns in the goosander (*Mergus-merganser*) and  
926 the red-breasted merganser (*Mergus-serrator*) in relation to patterns of activity in  
927 their major prey species. *Oecologia* **67**, 35-39.
- 928 **Slavík, O. and Horký, P.** (2012). Diel dualism in the energy consumption of the European  
929 catfish *Silurus glanis*. *J. Fish Biol.* **81**, 2223-2234.
- 930 **Sokolove, P. G. and Bushell, W. N.** (1978). The chi square periodogram: Its utility for  
931 analysis of circadian rhythms. *J. Theor. Biol.* **72**, 131-160.
- 932 **Takahashi, J. S.** (2017). Transcriptional architecture of the mammalian circadian clock. *Nat.*  
933 *Rev. Genet.* **18**, 164-179.
- 934 **Takahashi, M., Tahara, Y., Tsubosaka, M., Fukazawa, M., Ozaki, M., Iwakami, T.,**  
935 **Nakaoka, T. and Shibata, S.** (2018). Chronotype and social jetlag influence human  
936 circadian clock gene expression. *Sci. Rep.* **8**, 10152.
- 937 **Tamai, T. K., Young, L. C. and Whitmore, D.** (2007). Light signaling to the zebrafish  
938 circadian clock by *Cryptochrome 1a*. *Proc. Natl. Acad. Sci. U. S. A.* **104**, 14712-  
939 14717.
- 940 **Teboul, M., Barrat-Petit, M. A., Li, X. M., Claustrat, B., Formento, J. L., Delaunay, F.,**  
941 **Lévi, F. and Milano, G.** (2005). Atypical patterns of circadian clock gene expression  
942 in human peripheral blood mononuclear cells. *J. Mol. Med.* **83**, 693-9.
- 943 **Tessier, I., Boisclair, J., Pomerleau, R. and Thibault, A.** (2008). *État des connaissances*  
944 *- Parc national du Lac-Témiscouata*. QC, Canada: Bibliothèque et Archives  
945 nationales du Québec.
- 946 **Tudorache, C., Slabbekoorn, H., Robbers, Y., Hin, E., Meijer, J. H., Spaink, H. P. and**  
947 **Schaaf, M. J. M.** (2018). Biological clock function is linked to proactive and reactive  
948 personality types. *BMC Biol.* **16**, 148.
- 949 **Vatine, G., Vallone, D., Appelbaum, L., Mracek, P., Ben-Moshe, Z., Lahiri, K., Gothilf,**  
950 **Y. and Foulkes, N. S.** (2009). Light directs zebrafish *period2* expression via  
951 conserved D and E boxes. *PLoS Biol.* **7**, e1000223.
- 952 **Vaze, K. M. and Sharma, V. K.** (2013). On the adaptive significance of circadian clocks for  
953 their owners. *Chronobiol. Int.* **30**, 413-33.
- 954 **Vera, L. M., Cairns, L., Sánchez-Vázquez, F. J. and Migaud, H.** (2009). Circadian rhythms  
955 of locomotor activity in the Nile tilapia *Oreochromis niloticus*. *Chronobiol. Int.* **26**, 666-  
956 681.
- 957 **Vera, L. M., Madrid, J. A. and Sánchez-Vázquez, F. J.** (2006). Locomotor, feeding and  
958 melatonin daily rhythms in sharpsnout seabream (*Diplodus puntazzo*). *Physiol.*  
959 *Behav.* **88**, 167-172.

- 960 **Vera, L. M., Negrini, P., Zagatti, C., Frigato, E., Sánchez-Vázquez, F. J. and Bertolucci,**  
961 **C.** (2013). Light and feeding entrainment of the molecular circadian clock in a marine  
962 teleost (*Sparus aurata*). *Chronobiol. Int.* **30**, 649-661.
- 963 **Wang, H.** (2008a). Comparative analysis of period genes in teleost fish genomes. *J. Mol.*  
964 *Evol.* **67**, 29-40.
- 965 **Wang, H.** (2008b). Comparative analysis of teleost fish genomes reveals preservation of  
966 different ancient clock duplicates in different fishes. *Mar. Genom.* **1**, 69-78.
- 967 **Wang, H.** (2009). Comparative genomic analysis of teleost fish *bmal* genes. *Genetica* **136**,  
968 149-161.
- 969 **Wang, M., Zhong, Z., Zhong, Y., Zhang, W. and Wang, H.** (2015). The zebrafish period2  
970 protein positively regulates the circadian clock through mediation of retinoic acid  
971 receptor (RAR)-related orphan receptor  $\alpha$  (Rora). *J. Biol. Chem.* **290**, 4367-4382.
- 972 **Ware, J. V., Nelson, O. L., Robbins, C. T. and Jansen, H. T.** (2012). Temporal organization  
973 of activity in the brown bear (*Ursus arctos*): roles of circadian rhythms, light, and food  
974 entrainment. *Am. J. Physiol. Regul. Integr. Comp. Physiol.* **303**, R890-R902.
- 975 **Wark, A. R., Greenwood, A. K., Taylor, E. M., Yoshida, K. and Peichel, C. L.** (2011).  
976 Heritable differences in schooling behavior among threespine stickleback  
977 populations revealed by a novel assay. *PLoS One* **6**, e18316.
- 978 **Waterhouse, J., Reilly, T., Atkinson, G. and Edwards, B.** (2007). Jet lag: trends and  
979 coping strategies. *The Lancet* **369**, 1117-1129.
- 980 **Weger, M., Weger, B. D., Diotel, N., Rastegar, S., Hirota, T., Kay, S. A., Strähle, U. and**  
981 **Dickmeis, T.** (2013). Real-time in vivo monitoring of circadian E-box enhancer  
982 activity: A robust and sensitive zebrafish reporter line for developmental, chemical  
983 and neural biology of the circadian clock. *Dev. Biol.* **380**, 259-273.
- 984 **Whitmore, D., Foulkes, N. S. and Sassone-Corsi, P.** (2000). Light acts directly on organs  
985 and cells in culture to set the vertebrate circadian clock. *Nature* **404**, 87-91.
- 986 **Whitmore, D., Foulkes, N. S., Strähle, U. and Sassone-Corsi, P.** (1998). Zebrafish *Clock*  
987 rhythmic expression reveals independent peripheral circadian oscillators. *Nat.*  
988 *Neurosci.* **1**, 701-707.
- 989 **Worgan, J. P. and Fitzgerald, G. J.** (1981). Diel activity and diet of three sympatric  
990 sticklebacks in tidal salt marsh pools. *Can. J. Zool.* **59**, 2375-2379.
- 991 **Závorka, L., Aldvén, D., Näslund, J., Höjesjö, J. and Johnsson, J. I.** (2016). Inactive trout  
992 come out at night: behavioral variation, circadian activity, and fitness in the wild.  
993 *Ecology* **97**, 2223-2231.

994



995 **Supplementary information**

996

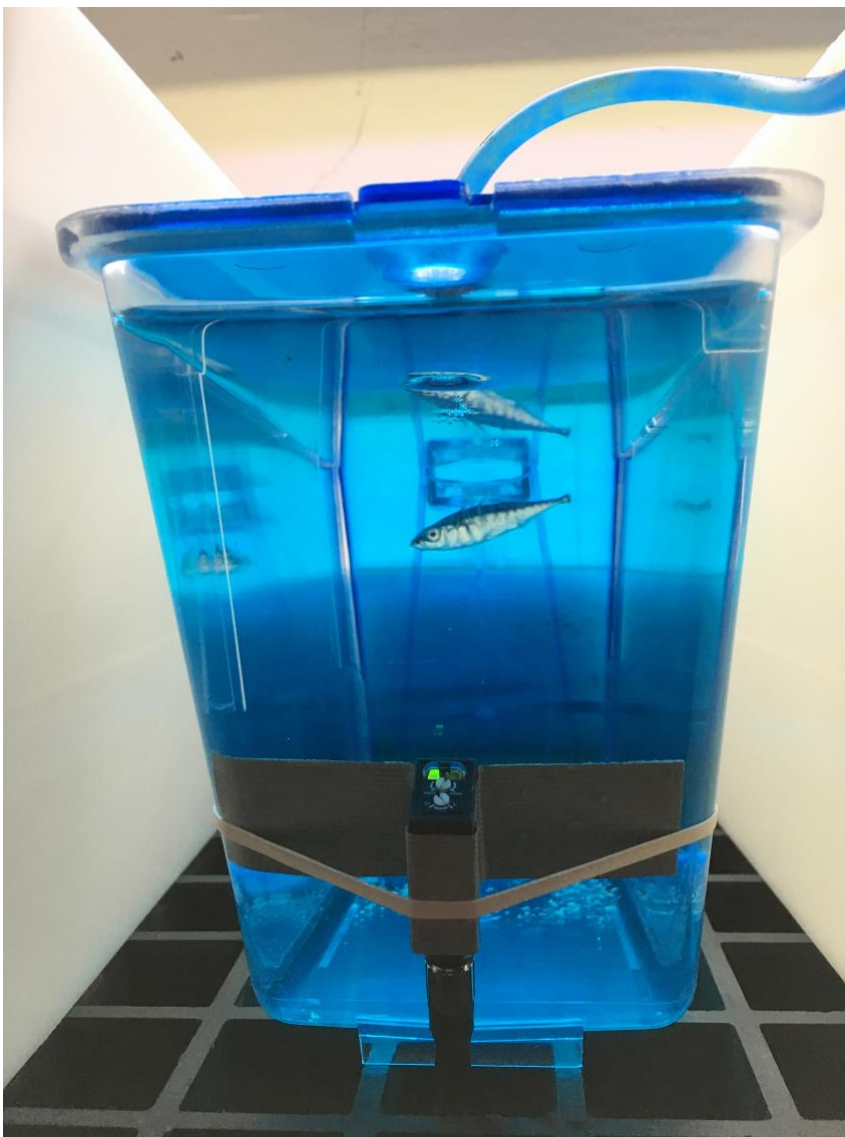

997

998 **Fig. S1. Position of the infrared photoelectric sensor on an experimental tank.** Each  
999 experimental tank was equipped with one infrared photoelectric sensor placed in the lower  
1000 third of the front wall. Every interruption of the infrared light beam by the fish was counted  
1001 as one movement.

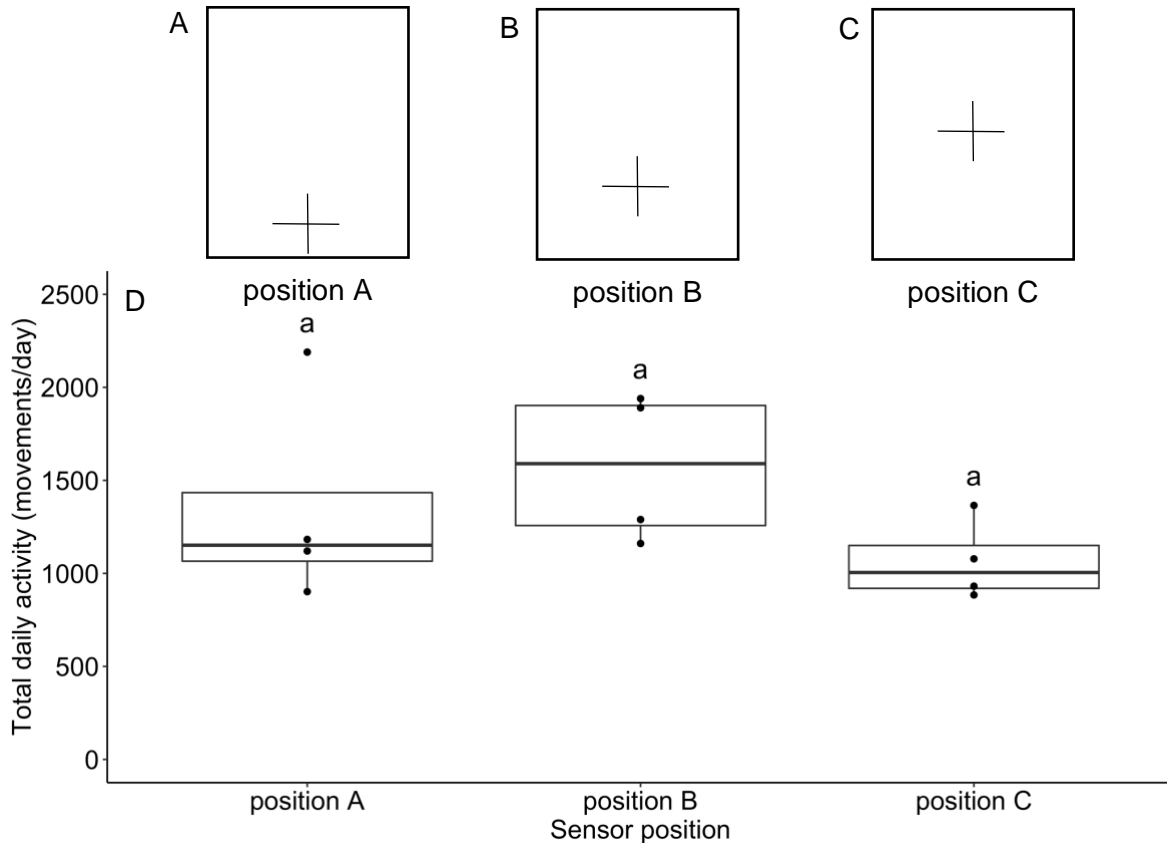

1002

1003

1004

1005

1006

1007

1008

1009

1010

1011

1012

1013

1014

**Fig. S2. Sensors position optimization.** (A, B, C) In order to determine in which position the sensors detect the most movements, we did a pilot study using 12 fish. We put each fish in an experimental tank equipped with a sensor that was either placed at the very bottom (position A), in the lower third (position B) or in the middle of the front wall (position C), so that there were 4 fish per position ( $n=4/\text{position}$ ). We monitored locomotor activity for 8 days under a 12 h light:12 h dark cycle. The rectangle and the cross represent the front wall of the tank and the position of the sensor, respectively. (D) Average of the total daily activity (movements/day, average for 8 days) depending on the position of the sensor. Although there is no significant difference between positions (as indicated by the letter “a”, one-way ANOVA,  $p>0.05$ ), the sensors in position B detect slightly more movements. We thus chose position B for our experiments (see Fig. S1). The black line in the middle of each boxplot indicates the median and each dot represents an individual.

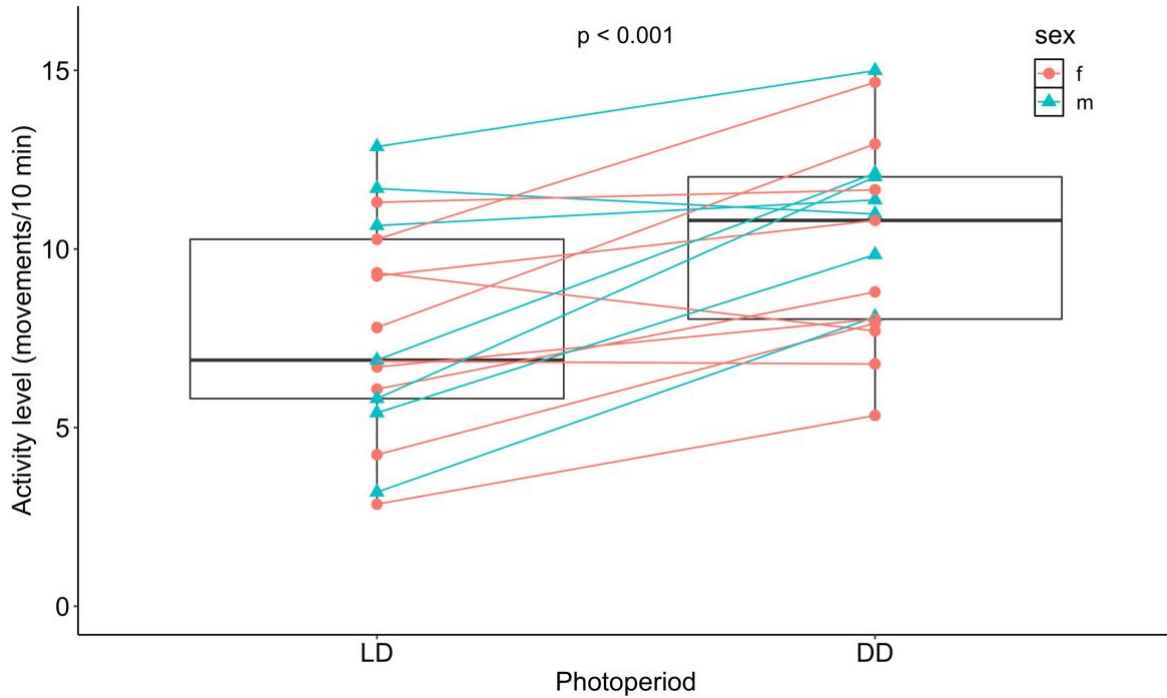

1015

1016 **Fig. S3. Sticklebacks are less active during the light phase in LD than during the**  
1017 **subjective light phase in DD.** Average activity level (movements/10 min) for each  
1018 individual during the light phase of a 12 h light:12 h dark cycle (LD, average for 8 days) and  
1019 during the subjective light phase in constant darkness (DD, average for 10 days). Paired t-  
1020 test,  $p < 0.001$ ,  $n = 17$ .
